1  
2  
3  
4  
5  
6  
7  
8  
9  
10  
11  
12  
13  
14  
15  
16  
17  
18  
19  
20

**Binding to DCAF1 distinguishes TASOR and SAMHD1 degradation by HIV-2 Vpx**

Michaël M Martin<sup>¶</sup>, Roy Matkovic<sup>¶</sup>, Pauline Larrous<sup>l</sup>, Marina Morel<sup>l</sup>, Angélique Lasserre<sup>l</sup>, Virginie Vauthier<sup>l</sup>, Florence Margottin-Goguet<sup>l\*</sup>

<sup>l</sup> Institut Cochin, Université de Paris, INSERM U1016, CNRS UMR8104, Paris, France

\* Corresponding authors:

[florence.margottin-goguet@inserm.fr](mailto:florence.margottin-goguet@inserm.fr) (FMG)

¶ contributed equally to the work

**Short Title:**

**Mechanism of TASOR degradation by HIV-2 Vpx**

## 21 **Abstract**

22 Human Immunodeficiency viruses type 1 and 2 (HIV-1 and HIV-2) succeed to evade host immune  
23 defenses by using their viral auxiliary proteins to antagonize host restriction factors. HIV-2/SIVsmm  
24 Vpx is known for degrading SAMHD1, a factor impeding the reverse transcription. More recently, Vpx  
25 was also shown to counteract HUSH, a complex constituted of TASOR, MPP8 and periphilin, which  
26 blocks viral expression from the integrated viral DNA. In a classical ubiquitin ligase hijacking model,  
27 Vpx bridges the DCAF1 ubiquitin ligase substrate adaptor to SAMHD1, for subsequent ubiquitination  
28 and degradation. Here, we investigated whether the same mechanism is at stake for Vpx-mediated  
29 HUSH degradation. While we confirm that Vpx bridges SAMHD1 to DCAF1, we show that TASOR  
30 can interact with DCAF1 in the absence of Vpx. Nonetheless, this association was stabilized in the  
31 presence of Vpx, suggesting the existence of a ternary complex. The N-terminal PARP-like domain of  
32 TASOR is involved in DCAF1 binding, but not in Vpx binding. We also characterized a series of HIV-2  
33 Vpx point mutants impaired in TASOR degradation, while still degrading SAMHD1. Vpx mutants  
34 ability to degrade TASOR correlated with their capacity to enhance HIV-1 minigenome expression as  
35 expected. Strikingly, several Vpx mutants impaired for TASOR degradation, but not for SAMHD1  
36 degradation, had a reduced binding affinity for DCAF1, but not for TASOR. In macrophages, Vpx  
37 R34A-R42A and Vpx R42A-Q47A-V48A, strongly impaired in DCAF1, but not in TASOR binding,  
38 could not degrade TASOR, while being efficient in degrading SAMHD1. Altogether, our results  
39 highlight the central role of a robust Vpx-DCAF1 association to trigger TASOR degradation. We then  
40 propose a model in which Vpx interacts with both TASOR and DCAF1 to stabilize a TASOR-DCAF1  
41 complex. Furthermore, our work identifies Vpx mutants enabling the study of HUSH restriction  
42 independently from SAMHD1 restriction in primary myeloid cells.

43

## 44 **Author Summary**

45 Human Immunodeficiency Virus (HIV) is still a major public health issue. The understanding of the  
46 molecular battle occurring during viral infection, between HIV components and cellular antiviral  
47 factors, the so-called restriction factors, is a key determinant for new treatment development. Namely,  
48 HIV auxiliary proteins are powerful to induce the downregulation of cellular restriction factors by  
49 hijacking the Ubiquitin-Ligase/proteasome pathway, in order to facilitate the completion of a well-  
50 processed HIV replication cycle. For instance, HIV-2 Vpx eases reverse transcription in myeloid cells  
51 by counteracting the SAMDH1 restriction factor. More recently, we discovered the ability of Vpx to  
52 induce the degradation of the HUSH epigenetic repressor complex to favor in turn, the expression of the  
53 provirus. In this study, we uncovered the mechanisms by which Vpx antagonizes TASOR, the core  
54 subunit of the HUSH complex. We highlighted key differences between Vpx-induced TASOR and  
55 SAMHD1 degradation. These findings will help to propose strategies to study or to target either HUSH  
56 or SAMHD1, especially in myeloid cells where the two restriction factors coexist.

57

## 58 **Introduction**

59 Human Immunodeficiency viruses type 1 and 2 (HIV-1 and HIV-2), responsible for Acquired  
60 Immunodeficiency Syndrome (AIDS), appeared in humans after cross-species transmission of non-  
61 human primate viruses (Simian Immunodeficiency viruses or SIV). They encode for viral auxiliary  
62 proteins, which play a major role in helping the virus to evade hurdles represented by “Restriction  
63 factors” [1]. Commonly, they act as viral antagonists engaging specific ubiquitin ligases to induce the  
64 ubiquitination and subsequent degradation of the restriction factor and, in turn, enabling the virus to  
65 bypass a specific block along the viral life cycle [2]. The Cullin-RING-type class of E3 ubiquitin ligases,  
66 constituted of a central Cullin scaffold protein and a catalytic RING subunit [3], represent the major  
67 class of ubiquitin ligases hijacked by lentiviral proteins including Vpr and Vpx [2]. All extant  
68 lentiviruses encode for Vpr, while Vpx is only encoded by the HIV-2/SIVmac/SIVsmm (infecting  
69 human, macaque and sooty mangabey, respectively) and SIVrcm/mnd-2 (infecting red-capped  
70 mangabey and mandrill) lineages [4-6]. Both Vpr and Vpx are incorporated into virions [7, 8] and  
71 present structural (3 $\alpha$ -helices and unstructured N- and C-terminal tails) and functional similarities, likely  
72 due to an ancestral Vpr gene duplication or a recombination event, which has given rise to Vpx [4-6, 9].  
73 To ensure their functions, both viral proteins bind to the DDB1- and Cul4-associated factor 1 (DCAF1)  
74 substrate adaptor of the host Cullin4A-RING ubiquitin ligase [10-19]. While Vpr exhibits a wide range  
75 of cellular substrates [20-28], reviewed in [29], Vpx seems to target only a few pathways *via* DCAF1  
76 [30-33]. At the forefront, HIV-2/SIVsmm Vpx induces the degradation of SAMHD1, relieving a block  
77 at the reverse transcription step [31, 32]. SAMHD1 is a deoxynucleotide triphosphate (dNTP)  
78 triphosphohydrolase that restricts HIV replication by lowering the pool of dNTP and thereby inhibits  
79 the synthesis of viral DNA in non-dividing cells, macrophages and quiescent CD4<sup>+</sup> T cells [34-38]. Vpx  
80 bridges SAMHD1 to DCAF1, leading to SAMHD1 poly-ubiquitination and subsequent degradation [31,  
81 32, 39]. Intriguingly, Vpx/Vpr proteins from divergent viruses, despite their structural homology, target  
82 entirely different domains of SAMHD1 in a species-specific manner [40-42]. This difference in  
83 SAMHD1 recognition is evolutionarily dynamic and is further witnessed by sites of positive selection  
84 in both N- and C-terminal domains of the host protein [9, 40, 43]. Crystal structures of SIVsmm Vpx,

85 DCAF1 and the C-terminal region of human SAMHD1 complex, and between SIVmnd-2 Vpx, DCAF1  
86 and the N-terminal region of mandrill SAMHD1 highlight a conserved mode of interaction of Vpx with  
87 DCAF1, as well as providing clues as to how a conserved DCAF1-Vpx module can bind different  
88 SAMHD1 from different host-species [41, 42]. In addition to SAMHD1, we and others uncovered the  
89 ability of HIV-2/SIVsmm Vpx to induce the degradation of HUSH, an epigenetic complex repressing  
90 the expression of transgenes, retroelements and hundreds of cellular genes [30, 33, 44-47]. The HUSH  
91 complex is constituted of three subunits, TASOR, MPP8 and Periphilin, with TASOR acting as a core  
92 member by interacting with both MPP8 and periphilin [47, 48]. TASOR contains at its N-terminus part  
93 an inactive poly ADP-ribose polymerase (PARP)-like domain essential for HUSH-mediated repression  
94 [48].

95 By degrading HUSH, Vpx favours viral expression in a model of HIV-1 latency, which is referred to  
96 “viral reactivation” thereafter [30, 33]. Altogether, Vpx induces the degradation of two antiviral proteins  
97 acting at two different steps of the viral life cycle: SAMHD1, at the reverse transcription step, and  
98 HUSH, at a post-integration step.

99 As of today, the molecular determinants of SIVsmm Vpx involved in SAMHD1 antagonism are well  
100 characterized. Indeed, Vpx interacts directly with SAMHD1 and DCAF1, with residues located in the  
101  $\alpha$ -helices 1 and 3 for SAMHD1 and several residues along Vpx for DCAF1 as described in [5, 39, 42].  
102 However, the molecular details of how Vpx promotes HUSH degradation have been poorly investigated.  
103 Our previous results suggest that HUSH destabilization by Vpx occurs within a TASOR-MPP8  
104 complex, with TASOR being the most efficiently impacted by Vpx. Several results initially led us to  
105 hypothesize that the mechanism of HUSH degradation by Vpx is likely to follow the mechanism of  
106 SAMHD1 degradation. Indeed, we showed that DCAF1 depletion or mutation of the Q76 residue in  
107 SIVsmm Vpx, critical for binding to DCAF1 [14], prevented TASOR degradation. In addition, SIVsmm  
108 Vpx Q76R interacted with TASOR. On the other hand, SIVsmm Vpx Q47A-V48A was identified as a  
109 TASOR-binding-deficient mutant that failed to induce TASOR degradation, but still degraded  
110 SAMHD1. Altogether these results suggested a “ubiquitin ligase hijacking model”, in which Vpx would  
111 bridge DCAF1 to the HUSH complex. Here we have challenged this model by performing additional  
112 interaction and functional experiments and by characterizing new HIV-2 Vpx mutants. Our results

113 demonstrate that TASOR binds DCAF1 independently from Vpx, while Vpx reinforces the strength of  
114 interaction between the two cellular proteins. Furthermore, the ability of Vpx to interact with DCAF1  
115 correlates with TASOR degradation by Vpx, while degradation of SAMHD1 is efficient even when  
116 binding of Vpx to DCAF1 is strongly impaired. These results led us to speculate that a novel  
117 rearrangement of the HUSH-DCAF1 interaction by Vpx is necessary for HUSH degradation.

118

## 119 **Results**

### 120 **TASOR interacts with DCAF1 and this association is stabilized by HIV-2 Vpx**

121 The study here is dedicated to HIV-2 Vpx from the Ghana-1 strain [49]. In agreement with our previous  
122 results obtained using SIVsmm Vpx proteins [30], immunoprecipitation of HA-tagged Vpx from HIV-  
123 2 with anti-HA antibodies pulled-down TASOR-Flag (Fig 1A, lane 5). The DCAF1 binding-deficient  
124 Vpx Q76R mutant has kept its ability to bind TASOR (Fig 1A, lane 6). Of note, HIV-2 HA-Vpx was  
125 detected as a monomer and as a dimer (Fig 1A or 1B, input) and the dimeric form was better  
126 immunoprecipitated with TASOR than the monomeric form in the reverse immunoprecipitation  
127 experiment of TASOR-Flag (Fig 1B, lane 6). This non-denaturable dimeric form of Vpx was previously  
128 described in [50]. Nonetheless, monomeric Vpx was also observed interacting with TASOR (Fig 1B,  
129 lane 6). The interaction was confirmed between Flag-tagged Vpx, which is unable to form dimers, and  
130 HA-TASOR (S1A Fig). To our surprise, endogenous DCAF1 was immunoprecipitated with TASOR-  
131 Flag in the absence of Vpx (Fig 1B, lane 5), though this TASOR-DCAF1 interaction was reinforced in  
132 the presence of Vpx (Fig 1B, compare lanes 5 and 6, DCAF1 panel). In contrast, DCAF1 was  
133 immunoprecipitated with SAMHD1-Flag only in the presence of Vpx as expected [39] (Fig 1C, lane 6).  
134 Interaction between TASOR and DCAF1 isoform 1 or DCAF1 isoform 3, which lacks the  
135 chromodomain present in isoform 1 [51], was confirmed following overexpression of the proteins (S1B  
136 Fig). Thus, while Vpx bridges SAMHD1 to DCAF1, TASOR interacts with DCAF1 independently from  
137 Vpx. This result raised the possibility that DCAF1, as an adaptor of a ubiquitin ligase complex, could  
138 be involved in TASOR modulation. Nonetheless, in our conditions, we could not observe any  
139 endogenous TASOR levels modulation upon DCAF1 depletion (S1C Fig). We further wondered

140 whether binding of Vpx to TASOR could depend on a pre-existing TASOR-DCAF1 complex. The  
141 interaction between TASOR-Flag and HA-Vpx or between HA-TASOR and Flag-Vpx was found  
142 equivalent irrespective of DCAF1 expression (Fig 1D, compare lanes 10 to 8 and S1D Fig). These  
143 results, together with the finding of an association between Vpx Q76R and TASOR, suggest that Vpx  
144 can interact with TASOR independently from DCAF1.

145 Because Vpx stabilizes the TASOR-DCAF1 interaction, we expected Vpx and DCAF1 to bind distinct  
146 domains of TASOR. Figure 2A depicts the TASOR constructs we tested for their interaction with  
147 DCAF1: 1-1670 and 1-1512 represent two distinct TASOR isoforms that differ only in their C-terminal  
148 part, with 1-1512 being the one we have used in this manuscript. DCAF1 interacted preferentially with  
149 the 930 first amino acids of TASOR (Fig 2B, compare lanes 9 and 10). In contrast to DCAF1, Vpx  
150 perfectly binds the 630-1512 C-terminal fragment of TASOR (Fig 2C). The N-terminal domain of  
151 TASOR contains the PARP-like domain with no catalytic activity, but required to maintain transgene  
152 repression by HUSH [48]. Depletion of this domain reduced binding of DCAF1 to TASOR both in the  
153 absence or in the presence of Vpx (Fig 2D, compare lanes 9 to 8 and 12 to 11). In contrast, TASOR-  
154  $\Delta$ PARP was still able to bind equivalently to MPP8 in the absence of Vpx in agreement with results  
155 from Douse et al.[48] (Fig 2D, lanes 8,9), supporting the fact that the binding affinity of DCAF1 to  
156 TASOR- $\Delta$ PARP is weaker. Both TASOR WT and TASOR- $\Delta$ PARP over-expressions tend to increase  
157 MPP8 protein levels (Fig 2D, lanes 1-3). However, upon Vpx expression, endogenous MPP8  
158 accumulation could only be observed with the PARP-like truncated version of TASOR and not with  
159 TASOR WT, suggesting that TASOR N-terminus part is necessary for Vpx-mediated HUSH  
160 antagonism (Fig 2D, lanes 4-6 compared to lanes 1-3). Thereby, these results suggest that DCAF1 binds  
161 the N-terminus part of TASOR. Of importance, Vpx binds TASOR- $\Delta$ PARP as well as TASOR-WT (Fig  
162 2D, lanes 11, 12) suggesting that DCAF1 and Vpx interact with different regions in TASOR. However,  
163 the TASOR-DCAF1 interaction was no more stabilized by Vpx when TASOR PARP-like domain was  
164 removed (Fig. 2D, compare lanes 11 to 8, 12 to 9, quantification under the Figure).

165 Altogether, our results suggest the existence of a ternary complex between TASOR, DCAF1 and Vpx  
166 with independent possible binary interactions between the three partners.

167

## 168 **Vpx Q47AV48A and Vpx V48A have an unexpected defect in DCAF1 binding**

169 To further study the link between TASOR binding, TASOR degradation and increase of HIV-1  
170 minigenome expression, we investigated the impact of the individual Q47A and V48A mutations in  
171 HIV-2 Vpx, keeping in mind that we previously found SIVsmm Vpx Q47A-V48A to be impaired in  
172 TASOR binding and degradation [30]. Vpx proteins (WT or mutants) were incorporated into Viral-  
173 Like-Particles (VLPs). Their incorporations were checked and adjusted in order to deliver about the  
174 same quantity of viral proteins into J-Lat A1 T cells [52] (S2A Fig). These cells harbor a latent HIV-1-  
175 LTR-Tat-*IRES*-GFP-LTR cassette, which GFP expression is being cooperatively increased upon Vpx-  
176 mediated TASOR degradation along with Tumor Necrosis Factor alpha treatment (TNF $\alpha$ ) [30]. As in  
177 SIVsmm Vpx, mutation of both Q47 and V48 residues to alanines (QV mutant) in HIV-2 Vpx, strongly,  
178 but not fully, impaired TASOR degradation and viral reactivation (Figs 3A and 3B). Because J-Lat T  
179 cells do not express SAMHD1, we analyzed SAMHD1 degradation in the THP-1 myeloid cell line. The  
180 QV mutant was able to induce SAMHD1 degradation (Fig 3C). Vpx V48A, alike Vpx QV, was impaired  
181 in both TASOR degradation and viral reactivation, but not in SAMHD1 degradation. In contrast, Vpx  
182 Q47A could degrade both TASOR and SAMHD1, and was able to increase the GFP expression derived  
183 from the integrated HIV-1 minigenome (Figs 3A, 3B and 3C). Therefore, the V48A mutation is at stake  
184 in the loss of HUSH antagonism by the Vpx Q47A-V48A mutant.

185 Interaction experiments were further undertaken with proteins expressed from transfected vectors. Of  
186 note, the three HA-tagged Vpx mutants, Q47A, V48A and QV, were detected as monomers, but not  
187 dimers (Fig 3D, input, left). Following an anti-HA (Vpx) immunoprecipitation, none of them were found  
188 in association with TASOR, in contrast to WT Vpx (Fig 3D, TASOR-Flag panel). As this was  
189 inconsistent with Vpx Q47A being functional as well as WT Vpx (Figs 3A and 3B), we performed the  
190 reverse co-immunoprecipitation experiment pulling down first TASOR-Flag (Fig 3E). In these  
191 conditions, we could detect an interaction between TASOR and monomeric Vpx proteins, including  
192 Vpx Q47A (Fig 3E). Nonetheless, Vpx V48A and the QV mutant did not promote TASOR-DCAF1  
193 interaction as well as WT Vpx or Vpx Q47A (Fig 3E, DCAF1 panel and quantification under the Figure).  
194 Thus, we also tested the ability of these Vpx mutants to bind DCAF1. In our previous study [30], we



195 assumed Vpx Q47A-V48A would bind DCAF1 as it was able to degrade SAMHD1. However, to our  
196 surprise, interaction of Vpx Q47A-V48A or Vpx V48A with DCAF1 was strongly reduced, while Vpx  
197 Q47A could bind DCAF1 alike WT Vpx (Fig 3D, DCAF1 panel). Hence, the loss of activity of Vpx  
198 Q47A-V48A or Vpx V48A could result from lower binding affinity to DCAF1 and not necessarily from  
199 a loss of binding to TASOR.

200

### 201 **Integrity of a set of Vpx exposed residues is required for HUSH antagonism**

202 In an attempt to map Vpx residues important for TASOR binding, we put forward the hypothesis that  
203 these residues would not be in contact with DCAF1 or SAMHD1 (see Fig 4A for such contacts).  
204 SIVsmm Vpx lacking the C-terminal poly-proline tail is still able to assemble into a ternary complex  
205 with SAMHD1 and DCAF1 and to induce SAMHD1 ubiquitination [39, 53]. Thus, we first focused on  
206 this flexible C-terminal tail but found that the dimeric form of the C-terminus truncated Vpx, could still  
207 interact with TASOR (S3 Fig). We then paid attention to exposed residues alike Vpx R42, which is  
208 present in most Vpx from the HIV-2/SIVsmm lineage and Vpr proteins from the SIVagm lineage able  
209 to counteract HUSH, but not in some lineages defective for HUSH degradation [30]. When looking at  
210 the published crystal structure of the complex between SIVsmm Vpx, the C-terminus domains of  
211 DCAF1 and SAMHD1, the residue R42 appeared accessible, i.e. in contact neither with SAMHD1 nor  
212 with DCAF1, and located in a charged area with several Arginine and Acid glutamic residues (Fig 4A,  
213 based on [42]). Therefore, we decided to substitute R42 and these other charged residues, namely E30,  
214 R34 from  $\alpha$ -helix 1; E43, R51, R54 and D58 from  $\alpha$ -helix 2. In this second helix, we also mutated other  
215 exposed residues alike V37, N38, F46, W49, Q50, and did modify the C89 and L90 residues in the C-  
216 terminal tail (Fig 4A). All mutants were tested for TASOR and SAMHD1 degradation in J-Lat A1 T  
217 and THP-1 cells (Fig 4B and 4C). The quantity of VLP was adjusted to transduce the same quantity of  
218 Vpx proteins (S2A Fig). Some Vpx mutants were impaired in the degradation of both TASOR and  
219 SAMHD1 (W49A, C89A, D58A) and were not further considered. Among mutations that do not impact  
220 SAMHD1 degradation, some (R42A, V37A, N38A or L90A and R42A-QV (RQV) triple mutant)  
221 strongly impaired TASOR degradation and reactivation in J-Lat A1 T cells, while others (R34A, E43A,  
222 F46A, R51A) only reduced TASOR degradation and viral reactivation. Other Vpx mutants had no

223 impact (E30A, Q50A, R54A). Altogether, our results suggest that the integrity of a set of Vpx exposed  
224 residues (residues in red on Fig 4A) is important for HUSH antagonism. Importantly, a good correlation  
225 was obtained between Vpx ability to degrade TASOR and Vpx-mediated reactivation in J-Lat A1 T  
226 cells (Fig 4B and S4A).

227

## 228 **Vpx mutants defective for TASOR but not SAMHD1 degradation show a defect in DCAF1** 229 **binding**

230 Strikingly, all the Vpx mutants proficient for SAMHD1 degradation, but partially or totally deficient for  
231 TASOR degradation, were able to bind TASOR (S4A and S4B Figs), except monomeric V48A, as  
232 shown in Fig 3D, and RQV mutants, when pulling down first HA-Vpx. In contrast, we noticed that some  
233 of them, alike R34A, R42A, R51A, bound less efficiently to DCAF1 (S4A Fig). The reduced binding  
234 affinity of Vpx R34A and Vpx R42A for DCAF1 was reproducible (Fig 5A and Fig 5B). The double  
235 mutant Vpx R34A-R42A (RR) showed a dramatic decrease of its affinity for DCAF1, while it was still  
236 found interacting with TASOR (Fig 5A, lane 12 and Fig 5B). In addition, the interaction between  
237 TASOR-Flag and DCAF1 was not stabilized by Vpx RR or Vpx R42A (Fig 5C, lanes 11 and 12, DCAF1  
238 panel). In turn, Vpx R42A and Vpx RR could neither degrade TASOR, nor reactivate HIV-1 in J-Lat-  
239 A1 cells, while they could degrade SAMHD1 in THP-1 cells, though a little less efficiently for the RR  
240 mutant (Figs 5D, 5E, 5F and S2B Fig for VLPs incorporation). Of note, Vpx R34A shows a reduced  
241 binding to DCAF1, while still being able to induce TASOR degradation and reactivation, suggesting  
242 that binding to DCAF1 is not the only determinant at stake in HUSH antagonism. Altogether, these  
243 observations suggest the necessity of a strong binding affinity between Vpx and DCAF1 to stabilize the  
244 interaction between TASOR and DCAF1 and to induce TASOR degradation. Such strong binding is not  
245 as much requested for SAMHD1 degradation.

246

## 247 **Vpx RR and Vpx RQV degrade SAMHD1 but not TASOR in macrophages**

248 Up to now, TASOR degradation was analyzed in the J-Lat A1 T-cell line and SAMHD1 degradation in  
249 the THP-1 myeloid cell line. Because degradation of one protein could impact degradation of the other,

250 we questioned the phenotype of Vpx mutants in primary macrophages, in which both TASOR and  
251 SAMHD1 are present. In macrophages, Vpx-mediated SAMHD1 depletion was very efficient:  
252 SAMHD1 was still not detected 7 days after Vpx delivery (Fig 6A). In contrast, TASOR protein levels  
253 reappeared at day 1 or day 2 following Vpx addition, depending on the efficacy of Vpx delivery by  
254 VLPs (Fig 6A and S2C Fig for VLPs incorporation). In consequence, SAMHD1 and TASOR  
255 degradation by Vpx and mutants were monitored between 0 and 24 hours following Vpx addition. While  
256 all mutants efficiently induced SAMHD1 degradation, differences were observed regarding TASOR  
257 degradation. Vpx QV, Vpx Q47A, Vpx V48A and Vpx R34A were all able to degrade TASOR in  
258 macrophages, even if degradation was slightly less efficient with Vpx V48A and Vpx Q47A-V48A for  
259 some donors (Fig 6B and S5A Fig.). Vpx R42A could also induce TASOR degradation, but less  
260 efficiently (Fig 6B and S5A Fig). Only Vpx RR and Vpx RQV were strongly impaired in TASOR  
261 degradation (Fig 6B and S5A Fig). As a control, the Vpr protein from Vervet African Green monkey  
262 SIV induced TASOR but not SAMHD1 degradation as expected (S5B Fig) [9, 30, 33]. Altogether, two  
263 Vpx mutants (Vpx RR and Vpx RQV), characterized by a decreased affinity for DCAF1 binding, are  
264 no more able to degrade TASOR but are proficient for SAMHD1 degradation in macrophages.

265

## 266 **Discussion**

267 The mechanism of Vpx-mediated degradation of HUSH relies on the use of the DCAF1 ubiquitin ligase  
268 adaptor suggesting the existence of a classical ubiquitin ligase hijacking model, in which Vpx would  
269 bridge HUSH to DCAF1, as it is the case for SAMHD1. Nonetheless, our findings here suggest that  
270 HUSH and SAMHD1 mechanisms present notable differences. Indeed, firstly, TASOR can interact with  
271 DCAF1, thanks to its PARP-like domain located in its N-terminal part, in the absence of Vpx, while  
272 SAMHD1 interacts with DCAF1 only in the presence of Vpx; secondly, the Vpx-mediated degradation  
273 of TASOR is less efficient than that of SAMHD1 (in agreement with results from our SILAC screen  
274 published in [30]); third, an apparently weaker interaction between Vpx and DCAF1 has no impact on  
275 the efficiency of SAMHD1 degradation, while it seems critical to stabilize the TASOR-DCAF1  
276 interaction and thus the degradation of TASOR (model Fig 7).

277

278 **TASOR interaction with DCAF1 in the absence of Vpx.** DCAF1/VprBP has been mainly studied as  
279 a component of an E3 ubiquitin ligase machinery playing a role in various cellular processes [54]. We  
280 showed that DCAF1 would not regulate TASOR levels in asynchronized cells (S1C Fig). However, it  
281 could be that DCAF1 controls TASOR expression in a specific cellular context, for instance in a specific  
282 window along cell cycle progression or upon DNA damage. Supporting this hypothesis, we repeatedly  
283 noticed that TASOR depleted of its PARP-like domain is better expressed than WT TASOR.  
284 Interestingly DCAF1 has been shown to negatively regulate transcription and to help the formation of  
285 repressive chromatin by binding histone H3 tails protruding from nucleosomes [55]. Moreover, DCAF1  
286 was shown to possess an intrinsic protein kinase activity and is capable of phosphorylating histone H2A  
287 on threonine 120 (H2AT120p) in a nucleosomal context [56]. A role of DCAF1 in gene expression has  
288 also been uncovered with the discovery of DCAF1 working in conjunction with the Enhancer of Zeste  
289 homolog EZH2, a histone methyl transferase associated with transcriptional repression [51]. Therefore,  
290 it would be interesting to test the possibility that TASOR works with DCAF1 to repress gene expression.  
291 Of note, we found some of the genes regulated by DCAF1 in Kim *et al.* [56] to be upregulated following  
292 TASOR depletion in an RNA-seq analysis (unpublished results), supporting the idea of a possible  
293 repressive activity of TASOR and DCAF1 on common genes. One may also wonder whether DCAF1,  
294 together with TASOR, could regulate HIV transcription. While DCAF1 is well-known as the ubiquitin  
295 ligase adaptor hijacked by Vpr and Vpx, a direct role of DCAF1 in viral transcription has not been  
296 investigated yet. In addition to a potential role in transcriptional repression, a cooperation between  
297 TASOR and DCAF1 might be at stake in the response to DNA damage. Indeed, DCAF1 interacts with  
298 Damage specific DNA Binding protein 1 (DDB1), which is found in complex with the PARP-domain  
299 containing PARP1 protein, a sensor of DNA damage (reviewed in [57]). The HUSH complex playing  
300 an important role in the epigenetic repression of integrated HIV and recently integrated retroelements,  
301 a role of TASOR in controlling expression of genes near DNA breaks has not been investigated yet.

302

303 **Vpx-mediated TASOR degradation: binding to HUSH.** We were able to highlight several positions  
304 in Vpx that are important for HUSH, but not for SAMHD1 antagonism, mainly in  $\alpha$ -helices 1 and 2 and

305 in the C-terminal tail of the viral protein. The integrity of several of these residues appears to be  
306 important for DCAF1 binding, whereas none of them seem required for TASOR binding. This result,  
307 together with the ability of TASOR to interact with DCAF1, led us to question whether the interaction  
308 of Vpx with DCAF1 might be sufficient to promote HUSH degradation. However, we do not favor this  
309 hypothesis at this time because the interaction between Vpx and TASOR does not depend on DCAF1.  
310 Indeed, on the one hand, the Vpx Q76R mutant deficient in binding to DCAF1 is able to interact with  
311 TASOR and on the other hand, Vpx interacts with TASOR even when DCAF1 is depleted. Altogether,  
312 the viral determinants at stake in Vpx to bind HUSH remain to be discovered. Furthermore, whether this  
313 interaction is direct needs to be investigated.

314

315 **Vpx-mediated TASOR degradation: binding to DCAF1.** Our results show that DCAF1 is better  
316 immunoprecipitated with TASOR in the presence of Vpx. Is it that Vpx induces a conformational  
317 rearrangement of the TASOR-DCAF1 complex allowing TASOR to better interact with DCAF1? Does  
318 Vpx create new contact points between a preexisting DCAF1-TASOR complex, modifying  
319 TASOR/DCAF1 complex conformation allowing TASOR targeting by the ubiquitination complex?  
320 Does Vpx bring more DCAF1 in the vicinity of TASOR? In other words, we do not yet know whether  
321 Vpx uses the DCAF1 molecule already in association with TASOR or whether Vpx reprograms a new  
322 DCAF1 molecule in order to promote TASOR degradation. Nonetheless, we rather favor the hypothesis  
323 that Vpx helps TASOR to interact better with DCAF1, since the interaction between TASOR- $\Delta$ PARP  
324 and DCAF1 is no more stabilized in the presence of Vpx, while TASOR- $\Delta$ PARP binds properly to Vpx  
325 (model Fig 7). In turn, we speculate that a conformational change could lead to efficient ubiquitination  
326 of TASOR, and thus to its efficient degradation by the proteasome. Strikingly, several Vpx mutants  
327 impaired for HUSH antagonism had a defect in DCAF1 binding, while none of them were impaired in  
328 TASOR binding. Namely, Vpx R42A, Vpx RR and Vpx V48A show reduced binding affinity to  
329 DCAF1, but not to TASOR, while being impaired in TASOR degradation in the T-cell line. Vpx R34A  
330 presents a moderate phenotype, with reduced affinity for DCAF1 like Vpx R42A, but not as defective  
331 in TASOR degradation. Consistently, Vpx R42A and Vpx RR do not stabilize the interaction between  
332 DCAF1 and TASOR, whereas Vpx R34A can still do so. Thus, determinants other than DCAF1 binding

333 could be at stake to explain loss of HUSH antagonism, such as a suitable gap between TASOR, DCAF1-  
334 associated E3 ubiquitin ligase and the E2 ubiquitin transferase enzyme. Alternatively, unknown  
335 components could contribute to Vpx-mediated degradation of TASOR. Further structural analysis by  
336 Cryo-Electro Microscopy of the ubiquitin ligase complex would be necessary to understand the  
337 positioning of TASOR and DCAF1.

338 Importantly, the phenotype of Vpx mutants is slightly different in macrophages, in which Vpx R34A,  
339 Vpx R42A and Vpx V48A still induce TASOR degradation. Only Vpx R34A-R42A and Vpx RQV  
340 mutants, which are strongly impaired in DCAF1 binding, do not efficiently degrade TASOR in  
341 macrophages. We wonder whether this could result from a lower expression of TASOR in macrophages  
342 compared to T cells, with Vpx being the limiting factor in T cells to remove all DCAF1-bound TASOR,  
343 in line with a stoichiometric mechanism. In contrast, SAMHD1 is perfectly degraded in macrophages  
344 irrespective of whether Vpx binds efficiently or not DCAF1, in line with a catalytic mechanism.  
345 Alternatively, the different abilities of some Vpx mutants to induce TASOR degradation in  
346 macrophages, but not in T cells, may also rely on the need or use of cell-specific host factors. The ability  
347 of some Vpx mutant to induce SAMHD1 degradation, while binding to DCAF1 was severely impaired,  
348 was also very intriguing. This reminds us of SIVdeb Vpx ability to induce SAMHD1 degradation  
349 without apparent binding to DCAF1 [58]. Whether an alternative ubiquitin ligase could be used by Vpx  
350 to induce SAMHD1 degradation in some specific circumstances remains a possibility.

351

352 **Studying the impact of HIV infection in myeloid cells.** The use of Vpx mutants capable of degrading  
353 SAMHD1, but not HUSH, could be useful for future studies to investigate the impact of HIV infection  
354 in myeloid lineages. Indeed, to date, several studies have used Vpx to overcome the reverse transcription  
355 blockage in macrophages or dendritic cells to efficiently infect these cells and study the impact of the  
356 infection on the cellular landscape [59, 60]. One may wonder whether the reported effects are actually  
357 the result of the infection or whether they could also result from HUSH degradation. This could be  
358 particularly true when studying the modification of the chromatin environment or HIV-induced innate  
359 sensing, as HUSH could interfere with both pathways. Indeed, it has been proposed that the regulation  
360 of LINE-1 by HUSH serves as a gatekeeper of type 1 interferon signaling, which, when deregulated,

361 could lead to autoinflammatory diseases [61]. On the other hand, we have seen that TASOR protein  
362 levels return rapidly after degradation by Vpx, which may reduce the side effects of HUSH depletion.  
363 Interestingly, SAMHD1 depletion by Vpx is long-lasting in macrophages compared to HUSH depletion.  
364 This difference might reflect the different outcomes resulting from the antagonism of these two  
365 restriction factors.

366

367 **Restriction of retroviruses along evolution.** The restriction of retroviruses by host proteins underlines  
368 the long co-evolution history between hosts and viruses. On the viral side, residues involved in the  
369 binding of the same substrate often differ between different lentiviral lineages, consistent with the  
370 molecular arms-race between hosts and viruses. In future studies, we will question whether differences  
371 in DCAF1 binding could also be demonstrated between viral proteins from different lineages, which  
372 could have some impact on HUSH, but not SAMHD1, antagonism. Understanding virus-host interaction  
373 mechanisms is important to better understand viral pathogenesis and to propose therapeutic strategies  
374 that could target restriction factors. Exploiting the activity of HUSH could be advantageous in different  
375 strategies, depending on whether the objective is to enhance or lock virus expression.

376

## 377 **Material and Methods**

### 378 **Plasmids**

379 Vpx HIV-2.Gh1 WT or mutants, tagged with a HA epitope at the N-terminus, are expressed from the  
380 pAS1b vector (pAS1b-HA)[11]. All Vpx mutants were produced by site-directed mutagenesis according  
381 to Phusion polymerase manufacture guide (Thermofisher), using the pAS1b-HA-Vpx HIV-2.Gh1 WT  
382 (UniP18045) as template. The pAS1b-HA Vpx  $\Delta$ C-ter has been constructed by introducing a stop codon  
383 at position 101 by site-directed mutagenesis. Flag-Vpx-HIV-2.Gh1 with a Flag epitope at the N-  
384 terminus, is expressed from pELR65-SBP-Flag vector. The TASOR expression vector, pLenti-TASOR-  
385 Flag, and the corresponding empty pLenti-Flag vector were purchased from Origene. HA-tagged  
386 TASOR are expressed from the pAS1b vector. pLenti-TASOR-Flag and pAS1b-HA-TASOR (1-1512)  
387 express a TASOR short isoform of 1512 amino-acids (NCBI Reference Sequence: NP\_001106207.1)  
388 with a Flag epitope at the C-terminus or a HA epitope at the N-terminus. pAS1b-HA-TASOR (1-1670)  
389 expresses a TASOR long isoform of 1670 amino-acids (NCBI Reference Sequence: NP\_001352564.1).  
390 pAS1b-HA-TAROR (1-931) or pAS1b-HA-TASOR (630-1512) have been constructed by InFusion  
391 technology (Takara) according to the kit manufacture guide, using HA-TASOR (1-1512) as template.  
392 SAMDH1, also with a Flag epitope at the C-terminus, is expressed from pCDNA3. DCAF1 isoform 1  
393 (UniP Q9Y4B6-1) or isoform 3 (UniP Q9Y4B6-3) with a Myc epitope at the N-terminus are expressed  
394 from the pCS2 vector. Amino acids 225 to 673 present in isoform 1 are absent from isoform 3. Vpr  
395 SIVagm.ver9063 with an HA-epitope at the N-terminus, is expressed from the pAS1b vector.

396

### 397 **Cell Culture**

398 Cell lines were regularly tested for mycoplasma contamination: contaminated cells were discarded to  
399 perform experiments only with noncontaminated cells. Cells were cultured in media from GIBCO:  
400 DMEM (HeLa, 293FT) or RPMI (THP-1, J-Lat), containing 10% heat-inactivated fetal bovine serum  
401 (FBS, Eurobio), 1,000 units ml<sup>-1</sup> penicillin, 1,000  $\mu$ g ml<sup>-1</sup> streptomycin and 2 mM glutamine (RPMI  
402 only) (Life Technologies). Cells were checked permanently according to morphology and functional  
403 features (SAMHD1 expression for THP-1 cells; no adherence and low GFP expression for J-Lat A1 T



404 cells, morphology for 293FT and HeLa cells). 293FT cells, optimized from VLP production, were a gift  
405 from N. Manel. J-Lat A1 T cells were a gift from E. Verdin.

406

#### 407 **siRNA treatment**

408 siRNA transfections were performed with DharmaFECT1 (Dharmacon, GE Lifesciences). The final  
409 concentration for all siRNA was 40nM. The following siRNA was used: siDCAF1:  
410 GGAGGGAAUUGUCGAGAAU (Dharmacon). The non-targeting control siRNAs (MISSION siRNA  
411 Universal Negative Control #1, SIC001) were purchased from Sigma Aldrich.

412

#### 413 **Isolation of primary cells**

414 PBMCs from the blood of anonymous donors (obtained in accordance with the ethical guidelines of the  
415 Institut Cochin, Paris and *Etablissement Français du Sang*) were isolated by Ficoll (GE Healthcare)  
416 density-gradient separation. Monocytes were isolated by positive selection with CD14 magnetic  
417 MicroBeads (Miltenyi Biotec). Monocyte-derived macrophages (MDMs) were obtained by 7 days  
418 stimulation with 20 ng ml<sup>-1</sup> macrophage colony-stimulating factor (M-CSF) and 10 ng ml<sup>-1</sup> granulocyte-  
419 macrophage colony-stimulating factor (GM-CSF) (Miltenyi Biotec).

420

#### 421 **Virus-like-Particle production and transduction**

422 VLPs were produced in 293FT cells by cotransfection of envelope and packaging vectors by the  
423 calcium-phosphate precipitation method. 3.10<sup>6</sup> cells were plated the day prior transfection in 10 cm  
424 culture dishes. 3μg of VSV-G plasmid, 8μg of SIV3+ ΔVprΔVpx packaging vector (a gift from N.  
425 Landau described in [62]) and 8μg of pAS1B-HA-Vpx (WT or mutants) or pAS1b-HA (for empty VLP)  
426 or pAS1b-HA-VprSIVagm.ver9063 were then transfected. Cell culture medium was collected 72h after  
427 transfection and filtered through 0.45 μm pore filters. VLPs were concentrated 100 times by sucrose  
428 gradient and ultracentrifugation (1h30 at 100 000g). The quality of VLP production and Vpx  
429 incorporation was analyzed and quantified by revelation of HA-Vpx and HIV-2 capsid (p27) levels by  
430 Western blot. VLP volumes were adjusted in order to transduce the same quantity of Vpx WT and

431 mutants onto cells. JLat-A1 suspension cells were transduced with VLPs 6h in reduced medium. Then  
432 cells were left untreated or treated with TNF- $\alpha$  (1 ng ml<sup>-1</sup>) overnight.

433

#### 434 **FACS analysis**

435 Cells were collected and resuspended in PBS-EDTA (0.5mM). Data were collected and analyzed with  
436 a BD Accuri C6 cytometer and software v100.264.21. At least 10,000 events in P1 were collected, the  
437 GFP-positive population was determined using untreated J-Lat A1 T cells according to the low  
438 percentage of GFP expressing cells. The same gate was maintained for all conditions. Analysis was  
439 performed on the whole GFP-positive population.

440

#### 441 **Immunoprecipitation and Western Blot**

442 For HA-Vpx (WT or mutant), Flag-Vpx, TASOR-Flag (WT or  $\Delta$ PARP), HA-TASOR constructions or  
443 SAMHD1-Flag immunoprecipitation: HeLa cells grown in 10 cm dishes were co-transfected by the  
444 calcium-phosphate precipitation method with pAS1b-HA or pAS1b-HA-Vpx (WT or mutant) or  
445 pELR65-SBP-Flag or pELR65-SBP-Flag-Vpx and pLenti-Flag or pLenti-TASOR-Flag (WT or  
446  $\Delta$ PARP) or pAS1B-HA-TASOR (constructions) or pcDNA3-Flag or pcDNA3-SAMDH1-Flag. 48h  
447 post-transfection, cells were treated with 10 $\mu$ M of proteasome inhibitor ALLN (CAS 110044-82-1,  
448 Santa Cruz) for 5h then cells were lysed in 700 $\mu$ L of RIPA buffer (50mM Tris-HCl pH7.5, 150mM  
449 NaCl, 10% Glycerol, 2mM EDTA, 0.5% NP40) containing an anti-protease cocktail (A32965,  
450 ThermoFischer). Cell lysates were clarified by centrifugation (10min, 12,000g) and 500  $\mu$ g of lysate  
451 was incubated with pre-washed EZview™ Red ANTI-HA Affinity Gel (E6779, Merck) or ANTI-  
452 Flag®M2 Affinity Gel (A2220, Merck) at 4°C, under overnight rotation. After three washes in wash  
453 buffer (50mM Tris-HCl pH7.5, 150mM NaCl), immunocomplexes were eluted with Laemmli buffer 1X  
454 with 20mM DTT and were separated by SDS-PAGE (Bolt Bis-Tris, 4-12%, Life Technologies).  
455 Following transfer onto PVDF membranes, proteins were revealed by immunoblot. Signal were  
456 acquired with Fusion FX (Vilber Lourmat) and for further analysis using Fusion software and Image J.  
457 The following antibodies, with their respective dilution in 5% skimmed milk in PBS-Tween 0.1%, were  
458 used: anti-HA-HRP (3F10) (N°12013819001, Roche) 1/10,000 ; anti-FLAG-HRP (A-8592, lot

459 61K9220, Sigma) 1/10,000 ; anti-HA (HA-7, H3663, lot 066M4837V, Merck) 1/1,000 ; anti-Flag M2  
460 (F1804-200UG- lot SLCD3990, Merck) 1/1,000 ; anti-TASOR (HPA006735, lots A106822, C119001,  
461 Merck) 1/1,000 ; anti-MPP8 (HPA040035, lot R38302, Merck) 1/1,000 ; anti-Actin (AC40, A3853,  
462 Merck) 1/1000 ; anti- $\alpha$ Tubulin (T9026-.2mL, lot 081M4861, Merck) 1/1,000 ; anti-GAPDH (6C5, SC-  
463 32233, Santa Cruz) 1/1,000. All secondary antibodies HRP-conjugated, anti-mouse (31430, lot  
464 VF297958, ThermoFisher) and anti-rabbit (31460, lots VC297287, UK293475 ThermoFisher), were  
465 used at a 1/20,000 dilution before reaction with Immobilon Classico (WBLUC0500, Merck Millipore)  
466 or Forte (WBLUF0100, Merck Millipore) Western HRP substrate.

467

### 468 **3D Structural Analysis**

469 The (C-ter DCAF1/SIVsm Vpx/C-ter SAMHD1) ternary complex structure was obtained from PDB  
470 4CC9 based on[42]. Structure analysis was performed with Pymol Software (Python).

471

### 472 **Acknowledgements**

473 We thank Claudine Pique and all members of the RIL team for fruitful comments during lab meetings  
474 for the project progress. We also thank Claudine Pique for her precious reading of the manuscript. We  
475 thank Lucie Etienne and Andrea Cimarelli for discussions on the concepts of the project and for their  
476 comments on a previous version of the manuscript. We thank Ghina Chougui for her preliminary  
477 analysis of some Vpx mutants. The authors also thank E. Verdin for J-Lat clones and N. Landau for SIV  
478 packaging constructs. The authors acknowledge the Cytometry and Immunobiology Facility of the  
479 Cochin Institute.

480

### 481 **Funding section**

482 This work was supported by grants from the "Agence Nationale de la Recherche sur le SIDA et les  
483 hépatites virales" (ANRS) and SIDACTION. M.M. was supported by SIDACTION; R.M. first by  
484 ANRS, then by SIDACTION and V.V. by ANRS. P.L. and A.L. received a fellowship from the French  
485 government.

## 486 **References**

- 487 1. Blanco-Melo D, Venkatesh S, Bieniasz PD. Intrinsic cellular defenses against human  
488 immunodeficiency viruses. *Immunity*. 2012;37(3):399-411. Epub 2012/09/25. doi:  
489 10.1016/j.immuni.2012.08.013. PubMed PMID: 22999946; PubMed Central PMCID:  
490 PMCPMC3912573.
- 491 2. Seissler T, Marquet R, Paillart JC. Hijacking of the Ubiquitin/Proteasome Pathway by the HIV  
492 Auxiliary Proteins. *Viruses*. 2017;9(11). doi: 10.3390/v9110322. PubMed PMID: 29088112; PubMed  
493 Central PMCID: PMCPMC5707529.
- 494 3. Zimmerman ES, Schulman BA, Zheng N. Structural assembly of cullin-RING ubiquitin ligase  
495 complexes. *Curr Opin Struct Biol*. 2010;20(6):714-21. Epub 2010/10/01. doi:  
496 10.1016/j.sbi.2010.08.010. PubMed PMID: 20880695; PubMed Central PMCID: PMCPMC3070871.
- 497 4. Etienne L, Hahn BH, Sharp PM, Matsen FA, Emerman M. Gene loss and adaptation to hominids  
498 underlie the ancient origin of HIV-1. *Cell Host Microbe*. 2013;14(1):85-92. doi:  
499 10.1016/j.chom.2013.06.002. PubMed PMID: 23870316; PubMed Central PMCID:  
500 PMCPMC3733229.
- 501 5. Schaller T, Bauby H, Hue S, Malim MH, Goujon C. New insights into an X-traordinary viral  
502 protein. *Front Microbiol*. 2014;5:126. doi: 10.3389/fmicb.2014.00126. PubMed PMID: 24782834;  
503 PubMed Central PMCID: PMCPMC3986551.
- 504 6. Tristem M, Marshall C, Karpas A, Hill F. Evolution of the primate lentiviruses: evidence from  
505 vpx and vpr. *Embo J*. 1992;11(9):3405-12. Epub 1992/09/01. PubMed PMID: 1324171; PubMed  
506 Central PMCID: PMC556875.
- 507 7. Accola MA, Bukovsky AA, Jones MS, Gottlinger HG. A conserved dileucine-containing motif  
508 in p6(gag) governs the particle association of Vpx and Vpr of simian immunodeficiency viruses  
509 SIV(mac) and SIV(agn). *J Virol*. 1999;73(12):9992-9. Epub 1999/11/13. PubMed PMID: 10559313;  
510 PubMed Central PMCID: PMC113050.
- 511 8. Selig L, Pages JC, Tanchou V, Preveral S, Berlioz-Torrent C, Liu LX, et al. Interaction with the  
512 p6 domain of the gag precursor mediates incorporation into virions of Vpr and Vpx proteins from

- 513 primate lentiviruses. *J Virol.* 1999;73(1):592-600. Epub 1998/12/16. PubMed PMID: 9847364; PubMed  
514 Central PMCID: PMC103865.
- 515 9. Lim ES, Fregoso OI, McCoy CO, Matsen FA, Malik HS, Emerman M. The ability of primate  
516 lentiviruses to degrade the monocyte restriction factor SAMHD1 preceded the birth of the viral  
517 accessory protein Vpx. *Cell Host Microbe.* 2012;11(2):194-204. Epub 2012/01/31. doi: S1931-  
518 3128(12)00005-4 [pii]  
519 10.1016/j.chom.2012.01.004. PubMed PMID: 22284954; PubMed Central PMCID: PMC3288607.
- 520 10. Belzile JP, Duisit G, Rougeau N, Mercier J, Finzi A, Cohen EA. HIV-1 Vpr-mediated G2 arrest  
521 involves the DDB1-CUL4AVPRBP E3 ubiquitin ligase. *PLoS Pathog.* 2007;3(7):e85. PubMed PMID:  
522 17630831.
- 523 11. Bergamaschi A, Ayinde D, David A, Le Rouzic E, Morel M, Collin G, et al. The human  
524 immunodeficiency virus type 2 Vpx protein usurps the CUL4A-DDB1 DCAF1 ubiquitin ligase to  
525 overcome a postentry block in macrophage infection. *J Virol.* 2009;83(10):4854-60. Epub 2009/03/07.  
526 doi: JVI.00187-09 [pii]  
527 10.1128/JVI.00187-09. PubMed PMID: 19264781; PubMed Central PMCID: PMC2682070.
- 528 12. DeHart JL, Zimmerman ES, Ardon O, Monteiro-Filho CM, Arganaraz ER, Planelles V. HIV-1  
529 Vpr activates the G2 checkpoint through manipulation of the ubiquitin proteasome system. *Virology.*  
530 2007;4:57. PubMed PMID: 17559673.
- 531 13. Hrecka K, Gierszewska M, Srivastava S, Kozackiewicz L, Swanson SK, Florens L, et al.  
532 Lentiviral Vpr usurps Cul4-DDB1[VprBP] E3 ubiquitin ligase to modulate cell cycle. *Proc Natl Acad*  
533 *Sci U S A.* 2007;104(28):11778-83. PubMed PMID: 17609381.
- 534 14. Le Rouzic E, Belaidouni N, Estrabaud E, Morel M, Rain JC, Transy C, et al. HIV1 Vpr arrests  
535 the cell cycle by recruiting DCAF1/VprBP, a receptor of the Cul4-DDB1 ubiquitin ligase. *Cell Cycle.*  
536 2007;6(2):182-8. Epub 2007/02/23. doi: 3732 [pii]. PubMed PMID: 17314515.
- 537 15. Schrofelbauer B, Hakata Y, Landau NR. HIV-1 Vpr function is mediated by interaction with  
538 the damage-specific DNA-binding protein DDB1. *Proc Natl Acad Sci U S A.* 2007;104(10):4130-5.  
539 PubMed PMID: 17360488.

- 540 16. Sharova N, Wu Y, Zhu X, Stranska R, Kaushik R, Sharkey M, et al. Primate lentiviral Vpx  
541 commandeers DDB1 to counteract a macrophage restriction. *PLoS Pathog.* 2008;4(5):e1000057. Epub  
542 2008/05/03. doi: 10.1371/journal.ppat.1000057. PubMed PMID: 18451984; PubMed Central PMCID:  
543 PMC2323106.
- 544 17. Srivastava S, Swanson SK, Manel N, Florens L, Washburn MP, Skowronski J. Lentiviral Vpx  
545 accessory factor targets VprBP/DCAF1 substrate adaptor for cullin 4 E3 ubiquitin ligase to enable  
546 macrophage infection. *PLoS Pathog.* 2008;4(5):e1000059. Epub 2008/05/10. doi:  
547 10.1371/journal.ppat.1000059. PubMed PMID: 18464893; PubMed Central PMCID: PMC2330158.
- 548 18. Tan L, Ehrlich E, Yu XF. DDB1 and Cul4A are required for human immunodeficiency virus  
549 type 1 Vpr-induced G2 arrest. *J Virol.* 2007;81(19):10822-30. PubMed PMID: 17626091.
- 550 19. Wen X, Duus KM, Friedrich TD, de Noronha CM. The HIV1 protein Vpr acts to promote G2  
551 cell cycle arrest by engaging a DDB1 and Cullin4A-containing ubiquitin ligase complex using  
552 VprBP/DCAF1 as an adaptor. *J Biol Chem.* 2007;282(37):27046-57. PubMed PMID: 17620334.
- 553 20. Dupont L, Bloor S, Williamson JC, Cuesta SM, Shah R, Teixeira-Silva A, et al. The SMC5/6  
554 complex compacts and silences unintegrated HIV-1 DNA and is antagonized by Vpr. *Cell Host Microbe.*  
555 2021. Epub 2021/04/04. doi: 10.1016/j.chom.2021.03.001. PubMed PMID: 33811831.
- 556 21. Forouzanfar F, Ali S, Wallet C, De Rovere M, Ducloy C, El Mekdad H, et al. HIV-1 Vpr  
557 mediates the depletion of the cellular repressor CTIP2 to counteract viral gene silencing. *Sci Rep.*  
558 2019;9(1):13154. Epub 2019/09/13. doi: 10.1038/s41598-019-48689-x. PubMed PMID: 31511615;  
559 PubMed Central PMCID: PMC6739472.
- 560 22. Greenwood EJD, Williamson JC, Sienkiewicz A, Naamati A, Matheson NJ, Lehner PJ.  
561 Promiscuous Targeting of Cellular Proteins by Vpr Drives Systems-Level Proteomic Remodeling in  
562 HIV-1 Infection. *Cell Rep.* 2019;27(5):1579-96 e7. doi: 10.1016/j.celrep.2019.04.025. PubMed PMID:  
563 31042482; PubMed Central PMCID: PMC6506760.
- 564 23. Hrecka K, Hao C, Shun MC, Kaur S, Swanson SK, Florens L, et al. HIV-1 and HIV-2 exhibit  
565 divergent interactions with HLTF and UNG2 DNA repair proteins. *Proc Natl Acad Sci U S A.*  
566 2016;113(27):E3921-30. doi: 10.1073/pnas.1605023113. PubMed PMID: 27335459; PubMed Central  
567 PMCID: PMC4941427.

- 568 24. Lahouassa H, Blondot ML, Chauveau L, Chougui G, Morel M, Leduc M, et al. HIV-1 Vpr  
569 degrades the HLTF DNA translocase in T cells and macrophages. *Proc Natl Acad Sci U S A*.  
570 2016;113(19):5311-6. doi: 10.1073/pnas.1600485113. PubMed PMID: 27114546; PubMed Central  
571 PMCID: PMC4868422.
- 572 25. Lv L, Wang Q, Xu Y, Tsao LC, Nakagawa T, Guo H, et al. Vpr Targets TET2 for Degradation  
573 by CRL4(VprBP) E3 Ligase to Sustain IL-6 Expression and Enhance HIV-1 Replication. *Mol Cell*.  
574 2018;70(5):961-70 e5. doi: 10.1016/j.molcel.2018.05.007. PubMed PMID: 29883611.
- 575 26. Schrofelbauer B, Yu Q, Zeitlin SG, Landau NR. Human immunodeficiency virus type 1 Vpr  
576 induces the degradation of the UNG and SMUG uracil-DNA glycosylases. *J Virol*. 2005;79(17):10978-  
577 87. Epub 2005/08/17. doi: 10.1128/JVI.79.17.10978-10987.2005. PubMed PMID: 16103149; PubMed Central PMCID:  
578 10.1128/JVI.79.17.10978-10987.2005. PubMed PMID: 16103149; PubMed Central PMCID:  
579 PMC1193627.
- 580 27. Yan J, Shun MC, Hao C, Zhang Y, Qian J, Hrecka K, et al. HIV-1 Vpr Reprograms  
581 CLR4(DCAF1) E3 Ubiquitin Ligase to Antagonize Exonuclease 1-Mediated Restriction of HIV-1  
582 Infection. *mBio*. 2018;9(5). Epub 2018/10/26. doi: 10.1128/mBio.01732-18. PubMed PMID:  
583 30352932; PubMed Central PMCID: PMC6199497.
- 584 28. Zhang F, Bieniasz PD. HIV-1 Vpr induces cell cycle arrest and enhances viral gene expression  
585 by depleting CCDC137. *Elife*. 2020;9. Epub 2020/06/17. doi: 10.7554/eLife.55806. PubMed PMID:  
586 32538781; PubMed Central PMCID: PMC7295576.
- 587 29. Fabryova H, Strelbel K. Vpr and Its Cellular Interaction Partners: R We There Yet? *Cells*.  
588 2019;8(11). Epub 2019/10/28. doi: 10.3390/cells8111310. PubMed PMID: 31652959; PubMed Central  
589 PMCID: PMC6912716.
- 590 30. Chougui G, Munir-Matloob S, Matkovic R, Martin MM, Morel M, Lahouassa H, et al. HIV-  
591 2/SIV viral protein X counteracts HUSH repressor complex. *Nat Microbiol*. 2018;3(8):891-7. doi:  
592 10.1038/s41564-018-0179-6. PubMed PMID: 29891865.
- 593 31. Hrecka K, Hao C, Gierszewska M, Swanson SK, Kesik-Brodacka M, Srivastava S, et al. Vpx  
594 relieves inhibition of HIV-1 infection of macrophages mediated by the SAMHD1 protein. *Nature*.  
595 2011;474(7353):658-61. Epub 2011/07/02. doi: 10.1038/nature10195 [pii]

596 10.1038/nature10195. PubMed PMID: 21720370.

597 32. Laguette N, Sobhian B, Casartelli N, Ringiard M, Chable-Bessia C, Seeger E, et al. SAMHD1  
598 is the dendritic- and myeloid-cell-specific HIV-1 restriction factor counteracted by Vpx. *Nature*.  
599 2011;474(7353):654-7. Epub 2011/05/27. doi: nature10117 [pii]

600 10.1038/nature10117. PubMed PMID: 21613998.

601 33. Yurkovetskiy L, Guney MH, Kim K, Goh SL, McCauley S, Dauphin A, et al. Primate  
602 immunodeficiency virus proteins Vpx and Vpr counteract transcriptional repression of proviruses by the  
603 HUSH complex. *Nat Microbiol*. 2018;3(12):1354-61. doi: 10.1038/s41564-018-0256-x. PubMed  
604 PMID: 30297740; PubMed Central PMCID: PMC6258279.

605 34. Baldauf HM, Stegmann L, Schwarz SM, Ambiel I, Trotard M, Martin M, et al. Vpx overcomes  
606 a SAMHD1-independent block to HIV reverse transcription that is specific to resting CD4 T cells. *Proc*  
607 *Natl Acad Sci U S A*. 2017;114(10):2729-34. doi: 10.1073/pnas.1613635114. PubMed PMID:  
608 28228523; PubMed Central PMCID: PMC5347584.

609 35. Goldstone DC, Ennis-Adeniran V, Hedden JJ, Groom HC, Rice GI, Christodoulou E, et al. HIV-  
610 1 restriction factor SAMHD1 is a deoxynucleoside triphosphate triphosphohydrolase. *Nature*.  
611 2011;480(7377):379-82. Epub 2011/11/08. doi: nature10623 [pii]  
612 10.1038/nature10623. PubMed PMID: 22056990.

613 36. Lahouassa H, Daddacha W, Hofmann H, Ayinde D, Logue EC, Dragin L, et al. SAMHD1  
614 restricts the replication of human immunodeficiency virus type 1 by depleting the intracellular pool of  
615 deoxynucleoside triphosphates. *Nat Immunol*. 2012;13(3):223-8. Epub 2012/02/14. doi: ni.2236 [pii]  
616 10.1038/ni.2236. PubMed PMID: 22327569.

617 37. Powell RD, Holland PJ, Hollis T, Perrino FW. Aicardi-Goutieres syndrome gene and HIV-1  
618 restriction factor SAMHD1 is a dGTP-regulated deoxynucleotide triphosphohydrolase. *J Biol Chem*.  
619 2011;286(51):43596-600. Epub 2011/11/10. doi: C111.317628 [pii]  
620 10.1074/jbc.C111.317628. PubMed PMID: 22069334; PubMed Central PMCID: PMC3243528.

621 38. Descours B, Cribier A, Chable-Bessia C, Ayinde D, Rice G, Crow Y, et al. SAMHD1 restricts  
622 HIV-1 reverse transcription in quiescent CD4+ T-cells. *Retrovirology*. 2012  
623 ;9:87. Epub 2012/10/25. doi: 1742-4690-9-87 [pii]



- 624 10.1186/1742-4690-9-87. PubMed PMID: 23092122; PubMed Central PMCID: PMC3494655.
- 625 39. Ahn J, Hao C, Yan J, DeLucia M, Mehrens J, Wang C, et al. HIV/simian immunodeficiency  
626 virus (SIV) accessory virulence factor Vpx loads the host cell restriction factor SAMHD1 onto the E3  
627 ubiquitin ligase complex CRL4DCAF1. *J Biol Chem.* 2012;287(15):12550-8. Epub 2012/03/01. doi:  
628 M112.340711 [pii]  
629 10.1074/jbc.M112.340711. PubMed PMID: 22362772; PubMed Central PMCID: PMC3321004.
- 630 40. Fregoso OI, Ahn J, Wang C, Mehrens J, Skowronski J, Emerman M. Evolutionary toggling of  
631 Vpx/Vpr specificity results in divergent recognition of the restriction factor SAMHD1. *PLoS Pathog.*  
632 2013;9(7):e1003496. doi: 10.1371/journal.ppat.1003496. PubMed PMID: 23874202; PubMed Central  
633 PMCID: PMCPMC3715410.
- 634 41. Schwefel D, Boucherit VC, Christodoulou E, Walker PA, Stoye JP, Bishop KN, et al. Molecular  
635 determinants for recognition of divergent SAMHD1 proteins by the lentiviral accessory protein Vpx.  
636 *Cell Host Microbe.* 2015;17(4):489-99. doi: 10.1016/j.chom.2015.03.004. PubMed PMID: 25856754;  
637 PubMed Central PMCID: PMCPMC4400269.
- 638 42. Schwefel D, Groom HC, Boucherit VC, Christodoulou E, Walker PA, Stoye JP, et al. Structural  
639 basis of lentiviral subversion of a cellular protein degradation pathway. *Nature.* 2014;505(7482):234-8.  
640 doi: 10.1038/nature12815. PubMed PMID: 24336198; PubMed Central PMCID: PMCPMC3886899.
- 641 43. Laguette N, Rahm N, Sobhian B, Chable-Bessia C, Munch J, Snoeck J, et al. Evolutionary and  
642 functional analyses of the interaction between the myeloid restriction factor SAMHD1 and the lentiviral  
643 Vpx protein. *Cell Host Microbe.* 2012;11(2):205-17. doi: 10.1016/j.chom.2012.01.007. PubMed PMID:  
644 22305291; PubMed Central PMCID: PMCPMC3595996.
- 645 44. Liu N, Lee CH, Swigut T, Grow E, Gu B, Bassik M, et al. Selective silencing of euchromatic  
646 L1s revealed by genome-wide screens for L1 regulators. *Nature.* 2018;11(553):7687  
647 . PubMed PMID: 29211708.
- 648 45. Marnef A, Finoux AL, Arnould C, Guillou E, Daburon V, Rocher V, et al. A cohesin/HUSH-  
649 and LINC-dependent pathway controls ribosomal DNA double-strand break repair. *Genes Dev.*  
650 2019;33(17-18):1175-90. Epub 2019/08/10. doi: 10.1101/gad.324012.119. PubMed PMID: 31395742;  
651 PubMed Central PMCID: PMCPMC6719620.

- 652 46. Robbez-Masson L, Tie CHC, Conde L, Tunbak H, Husovsky C, Tchasovnikarova IA, et al. The  
653 HUSH complex cooperates with TRIM28 to repress young retrotransposons and new genes. *Genome*  
654 *Res.* 2018;28(6):836-45. Epub 2018/05/08. doi: 10.1101/gr.228171.117. PubMed PMID: 29728366;  
655 PubMed Central PMCID: PMC5991525.
- 656 47. Tchasovnikarova IA, Timms RT, Matheson NJ, Wals K, Antrobus R, Gottgens B, et al. *GENE*  
657 *SILENCING*. Epigenetic silencing by the HUSH complex mediates position-effect variegation in  
658 human cells. *Science.* 2015;348(6242):1481-5. doi: 10.1126/science.aaa7227. PubMed PMID:  
659 26022416; PubMed Central PMCID: PMC4487827.
- 660 48. Douse CH, Tchasovnikarova IA, Timms RT, Protasio AV, Seczynska M, Prigozhin DM, et al.  
661 TASOR is a pseudo-PARP that directs HUSH complex assembly and epigenetic transposon control. *Nat*  
662 *Commun.* 2020;11(1):4940. Epub 2020/10/04. doi: 10.1038/s41467-020-18761-6. PubMed PMID:  
663 33009411; PubMed Central PMCID: PMC7532188.
- 664 49. Ueno F, Shiota H, Miyaura M, Yoshida A, Sakurai A, Tatsuki J, et al. Vpx and Vpr proteins of  
665 HIV-2 up-regulate the viral infectivity by a distinct mechanism in lymphocytic cells. *Microbes Infect.*  
666 2003;5(5):387-95. Epub 2003/05/10. doi: S128645790300042X [pii]. PubMed PMID: 12737994.
- 667 50. Kewalramani VN, Emerman M. Vpx association with mature core structures of HIV-2.  
668 *Virology.* 1996;218(1):159-68. doi: 10.1006/viro.1996.0176. PubMed PMID: 8615019.
- 669 51. Lee JM, Lee JS, Kim H, Kim K, Park H, Kim JY, et al. EZH2 generates a methyl degron that is  
670 recognized by the DCAF1/DDB1/CUL4 E3 ubiquitin ligase complex. *Mol Cell.* 2012;48(4):572-86.  
671 Epub 2012/10/16. doi: 10.1016/j.molcel.2012.09.004. PubMed PMID: 23063525.
- 672 52. Jordan A, Bisgrove D, Verdin E. HIV reproducibly establishes a latent infection after acute  
673 infection of T cells in vitro. *EMBO J.* 2003;22(8):1868-77. doi: 10.1093/emboj/cdg188. PubMed PMID:  
674 12682019; PubMed Central PMCID: PMC154479.
- 675 53. Belshan M, Kimata JT, Brown C, Cheng X, McCulley A, Larsen A, et al. Vpx is critical for  
676 SIV<sub>mac</sub> infection of pigtail macaques. *Retrovirology.* 2012;9:32. Epub 2012/04/26. doi: 10.1186/1742-  
677 4690-9-32. PubMed PMID: 22531456; PubMed Central PMCID: PMC3353869.
- 678 54. Schabla NM, Mondal K, Swanson PC. DCAF1 (VprBP): emerging physiological roles for a  
679 unique dual-service E3 ubiquitin ligase substrate receptor. *J Mol Cell Biol.* 2019;11(9):725-35. Epub

- 680 2018/12/28. doi: 10.1093/jmcb/mjy085. PubMed PMID: 30590706; PubMed Central PMCID:  
681 PMC6821201.
- 682 55. Kim K, Heo K, Choi J, Jackson S, Kim H, Xiong Y, et al. Vpr-binding protein antagonizes p53-  
683 mediated transcription via direct interaction with H3 tail. *Mol Cell Biol.* 2012;32(4):783-96. Epub  
684 2011/12/21. doi: 10.1128/MCB.06037-11. PubMed PMID: 22184063; PubMed Central PMCID:  
685 PMC3272969.
- 686 56. Kim K, Kim JM, Kim JS, Choi J, Lee YS, Neamati N, et al. VprBP has intrinsic kinase activity  
687 targeting histone H2A and represses gene transcription. *Mol Cell.* 2013;52(3):459-67. Epub 2013/10/22.  
688 doi: 10.1016/j.molcel.2013.09.017. PubMed PMID: 24140421; PubMed Central PMCID:  
689 PMC3851289.
- 690 57. Ray Chaudhuri A, Nussenzweig A. The multifaceted roles of PARP1 in DNA repair and  
691 chromatin remodelling. *Nat Rev Mol Cell Biol.* 2017;18(10):610-21. Epub 2017/07/06. doi:  
692 10.1038/nrm.2017.53. PubMed PMID: 28676700; PubMed Central PMCID: PMC6591728.
- 693 58. Berger G, Lawrence M, Hue S, Neil SJ. G2/M cell cycle arrest correlates with primate lentiviral  
694 Vpr interaction with the SLX4 complex. *J Virol.* 2014. Epub 2014/10/17. doi: JVI.02307-14 [pii]  
695 10.1128/JVI.02307-14. PubMed PMID: 25320300.
- 696 59. Johnson JS, Lucas SY, Amon LM, Skelton S, Nazitto R, Carbonetti S, et al. Reshaping of the  
697 Dendritic Cell Chromatin Landscape and Interferon Pathways during HIV Infection. *Cell Host Microbe.*  
698 2018;23(3):366-81 e9. Epub 2018/03/16. doi: 10.1016/j.chom.2018.01.012. PubMed PMID: 29544097;  
699 PubMed Central PMCID: PMC6176724.
- 700 60. Lahaye X, Satoh T, Gentili M, Cerboni S, Conrad C, Hurbain I, et al. The capsids of HIV-1 and  
701 HIV-2 determine immune detection of the viral cDNA by the innate sensor cGAS in dendritic cells.  
702 *Immunity.* 2013;39(6):1132-42. Epub 2013/11/26. doi: S1074-7613(13)00501-3 [pii]  
703 10.1016/j.immuni.2013.11.002. PubMed PMID: 24269171.
- 704 61. Tunbak H, Enriquez-Gasca R, Tie CHC, Gould PA, Mlcochova P, Gupta RK, et al. The HUSH  
705 complex is a gatekeeper of type I interferon through epigenetic regulation of LINE-1s. *Nat Commun.*  
706 2020;11(1):5387. Epub 2020/11/05. doi: 10.1038/s41467-020-19170-5. PubMed PMID: 33144593;  
707 PubMed Central PMCID: PMC67609715.

708 62. Gramberg T, Sunseri N, Landau NR. Evidence for an activation domain at the amino terminus  
709 of simian immunodeficiency virus Vpx. *J Virol*. 2010;84(3):1387-96. Epub 2009/11/20. doi: JVI.01437-  
710 09 [pii]10.1128/JVI.01437-09. PubMed PMID: 19923175; PubMed Central PMCID: PMC2812310.  
711

## 712 **Figures captions**

### 713 **Fig 1. Interaction between TASOR and DCAF1 is stabilized in the presence of Vpx.**

714 (A) HA-Vpx WT or DCAF1 binding-deficient HA-Vpx Q76R proteins were co-expressed with  
715 TASOR-Flag in HeLa cells, then an anti-HA immunoprecipitation was performed. (B) TASOR-Flag  
716 was co-expressed with HA-Vpx WT in HeLa cells, then an anti-Flag immunoprecipitation was  
717 performed. (C) SAMHD1-Flag was co-expressed with HA-Vpx WT in HeLa cells, then an anti-Flag  
718 immunoprecipitation was performed. (D) HeLa cells were treated with siRNA CTL or siRNA DCAF1.  
719 After 24h, HA-Vpx WT were co-expressed with TASOR-Flag for 48h, then an anti-HA  
720 immunoprecipitation was performed. In each panel, the indicated proteins were revealed by western  
721 blot.

722

### 723 **Fig 2. TASOR PARP-like domain is involved in DCAF1 binding.**

724 (A) Schematic representation of HA-tagged TASOR or Flag-tagged-TASOR constructions. *1-1670*:  
725 HA-TASOR long isoform. *1-1512*: HA-TASOR short isoform. *1-931*: N-terminal fragment of HA-  
726 TASOR. *630-1512*: C-terminal fragment of HA-TASOR short isoform. *WT*: TASOR-Flag (short  
727 isoform).  $\Delta$ *PARP*: TASOR-Flag (short isoform) deleted of the PARP-like domain (106-319 aa). (B)  
728 Indicated HA-TASOR constructions were expressed in HeLa cells, then an anti-HA  
729 immunoprecipitation was performed. (C) Flag-Vpx WT was co-expressed with indicated HA-TASOR  
730 constructions in HeLa cells, then an anti-Flag immunoprecipitation was performed. (D) TASOR-Flag  
731 WT or TASOR- $\Delta$ PARP-Flag were co-expressed with HA-Vpx WT in HeLa cells, then an anti-Flag  
732 immunoprecipitation was performed. In each panel, the indicated proteins were revealed by western  
733 blot.

734

### 735 **Fig 3. Vpx Q47AV48A loss of activity in J-Lat A1 T cells results from the V48A mutation.**

736 (A and B) HIV-2.Gh1 Vpx WT or indicated mutants were tested for TASOR degradation (A) and viral  
737 reactivation in J-Lat A1 T cells (B). J-Lat A1 T cells were treated with Vpx-containing VLPs. After  
738 overnight treatment with TNF- $\alpha$ , cells were analyzed by flow cytometry and whole-cell extracts by

739 western blot. (C) HIV-2.Gh1 Vpx WT or indicated mutants were tested for SAMDH1 degradation. Non-  
740 differentiated THP-1 cells were treated 24h with VLPs and whole-cell extracts were analyzed by western  
741 blot. (D and E) HA-Vpx WT or indicated mutants were co-expressed with TASOR-Flag in HeLa cells,  
742 then an anti-HA (D) or anti-Flag (E) immunoprecipitation was performed. *Empty*: VLP in which Vpx  
743 is not incorporated. *QV*: Vpx double mutant Q47A-V48A.

744

745 **Fig 4. The integrity of a set of Vpx exposed residues from  $\alpha$ -helix 1 and 2 and the C-ter tail is**  
746 **required for HUSH antagonism.**

747 (A) The representation of the crystallographic structure of CtD-huDCAF1/Vpx SIVsmm/CtD-  
748 huSAMHD1 ternary complex, resolved by Schwefel *et al* in 2014 [42] (PDB: 4CC9), has been adapted  
749 here to highlight Vpx residues we have tested in this study regarding SAMHD1 and HUSH degradation.  
750 *Top*: sequence alignment of HIV-2.Gh1 Vpx and SIVsmm Vpx. Our study is dedicated to HIV-2 Vpx,  
751 while the structure was done with SIVsmm Vpx. The two sequences share 79.81% identity and 92%  
752 similarity. Green and Yellow marks indicate residues of SIVsmm Vpx involved in DCAF1 and  
753 SAMDH1 binding respectively, according to Schwefel *et al*. [42] *Stars*: interaction by the lateral chain.  
754 *Dot*: Interaction by the principal chain. The integrity of residues shown in red is important for HUSH  
755 degradation, while this is not the case for residues in blue. Residues in bold dark are important for HUSH  
756 and SAMDH1 degradation. *Bottom*: Two different views of the CtD-huDCAF1/Vpx SIVsmm/CtD-  
757 huSAMHD1 complex, resolved by Schwefel *et al* in 2014[42] (PDB: 4CC9). CtD-huDCAF1 and CtD-  
758 huSAMHD1 are shown as surface in green and yellow, respectively. Vpx SIVsmm is shown as a ribbon  
759 in light pink. Tested residues involved (red) or not (blue) in HUSH antagonism are indicated. (B) HIV-  
760 2.Gh1 Vpx WT and mutants were tested for TASOR degradation and viral reactivation. J-Lat A1 T cells  
761 were treated with VLPs. After overnight treatment with TNF- $\alpha$ , cells were analyzed by flow cytometry  
762 and whole-cell extracts by western blot. (C) HIV-2.Gh1 Vpx WT and mutants were tested for SAMDH1  
763 degradation. Non-differentiated THP-1 cells were treated 24h with VLPs and whole-cell extracts were  
764 analyzed by western blot.

765

766 **Fig 5. Vpx R34A-R42A, which induces SAMHD1 but not TASOR degradation, is characterized**  
767 **by a reduced binding affinity for DCAF1.**

768 (A) HA-Vpx WT or indicated mutants were co-expressed with TASOR-Flag in HeLa cells, then an anti-  
769 HA immunoprecipitation was performed. (B) Graphic of DCAF1 binding efficiency. Co-  
770 immunoprecipitated DCAF1 and immunoprecipitated HA-Vpx (Vpx WT (n=6), Vpx R34A (n=6),  
771 R42A (n=6) and RR (n=4)) were quantified, ratios between both were calculated and reported to the one  
772 for Vpx WT (ratio 1). (C) TASOR-Flag was co-expressed with HA-Vpx WT or indicated mutants, then  
773 an anti-Flag immunoprecipitation was performed. (D and E) HIV-2.Gh1 Vpx WT and mutants were  
774 tested for viral reactivation (D) and TASOR degradation (E). J-Lat A1 T cells were treated with VLPs.  
775 After overnight treatment with TNF- $\alpha$ , cells were analyzed by flow cytometry and whole-cell extracts  
776 were analyzed by western blot. (F) HIV-2.Gh1 Vpx WT and mutants were tested for SAMHD1  
777 degradation, THP-1 cells were treated with VLP overnight and then whole-cell extracts were analyzed  
778 by western blot. RR: Vpx double mutant R34A-R42A.

779

780 **Fig 6. Vpx R34A-R42A and Vpx R42A-Q47A-V48A, both strongly impaired in DCAF1 binding,**  
781 **induce SAMHD1, but not TASOR degradation in macrophages.**

782 Long (A) and short (B) kinetics of TASOR and SAMHD1 degradation by HIV-2.Gh1 Vpx WT or  
783 mutants brought by VLP in Monocyte-derived-Macrophages (MDM). Purified monocytes from healthy  
784 donor were differentiated 7 days with GM-CSF and M-CSF. After differentiation, MDM were transduced  
785 with indicated Vpx-containing VLPs and harvested at indicated times. Whole-cell extracts were  
786 analyzed by western-blot. QV: Vpx double mutant Q47A-V48A. RQV: Vpx triple mutant R42A-Q47A-  
787 V48A. RR: Vpx double mutant R34A-R42A.

788

789 **Fig 7. Working Model.**

790 (A) TASOR antagonism. In the absence of Vpx, TASOR can be found in association with DCAF1.  
791 TASOR PARP-like domain is involved in this interaction. In the presence of Vpx WT, the interaction  
792 between TASOR and DCAF1 is stabilized, which may favor the recruitment of the whole ubiquitin-  
793 ligase and the subsequent poly-ubiquitination and degradation of TASOR. Vpx RR or Vpx RQV bind

794 TASOR but present a low affinity for DCAF1, which is represented by a black line; in turn, the  
795 interaction between TASOR and DCAF1 is no more stabilized and TASOR cannot be degraded. Of  
796 note, whether TASOR-DCAF1 and TASOR-Vpx interactions are direct or not is unknown. **(B)**  
797 SAMHD1 antagonism. SAMDH1 does not interact with DCAF1 in the absence of Vpx. Vpx bridges  
798 the two cellular proteins, allowing the recruitment of the whole ubiquitin ligase complex, SAMHD1  
799 ubiquitination and degradation. Vpx RR or RQV are both able to induce SAMHD1 degradation, despite  
800 their apparent low binding affinity for DCAF1.

801



## 802 **Supporting Information Captions**

### 803 **S1 Fig. Interactions between TASOR and Vpx and between TASOR and DCAF1**

804 (A) Flag-Vpx WT from HIV-2.Gh1 interacts with HA-TASOR. Flag-Vpx WT was co-expressed with  
805 HA-TASOR short isoform in HeLa cells, then an anti-Flag immunoprecipitation was performed. (B)  
806 TASOR interacts with the two isoforms of DCAF1 in an overexpression system. HA-TASOR short  
807 isoform was co-expressed with Myc-DCAF1 isoform 1 (iso1) or isoform 3 (iso3) in HeLa cells, then an  
808 anti-HA immunoprecipitation was performed. (\*) The Myc-DCAF1 band is seen in the HA-TASOR  
809 panel. (C) Endogenous TASOR is not stabilized after DCAF1 depletion. HeLa cells were transfected  
810 with 40nM of siCTL (-) or siDCAF1 (+) and cells were harvested at 48h and 72h. (D) Flag-Vpx interacts  
811 with HA-TASOR in absence of DCAF1. HeLa cells were treated with siRNA CTL or siRNA DCAF1.  
812 After 24h, Flag-Vpx WT was co-expressed with HA-TASOR for 48h, then an anti-Flag  
813 immunoprecipitation was performed. In each panel, the indicated proteins were revealed by western  
814 blot.

815

### 816 **S2 Fig. Analysis of HA-Vpx (WT or mutants) incorporation into VLP by western-blot.**

817 For each panel, VLP were produced in 293FT by co-transfection of a packaging vector, an envelope  
818 VSVg vector and a vector encoding HA-Vpx (WT or mutants). 72h post transfection, supernatants were  
819 harvested and VLP concentrated 100 times by ultracentrifugation. 12  $\mu$ L of each were analyzed by  
820 western blot. VLP production was checked with anti-P27 (HIV-2 capsid) antibody and HA-Vpx  
821 incorporation with an anti-HA antibody. (A) Western blot of VLP incorporation for Figures 3A, 3B, 3C  
822 and 4B, 4C. (B) Western Blot of VLP incorporation for Figures 5D, 5E, 5F. (C) Western Blot of VLP  
823 incorporation for Figures 6B.

824

### 825 **S3 Fig. TASOR still interacts with $\Delta$ C-ter Vpx.**

826 HA-Vpx WT or HA- $\Delta$ C-ter Vpx were co-expressed with TASOR-Flag in HeLa cells, then an anti-HA  
827 immunoprecipitation was performed.

828

829 **S4 Fig. Some Vpx mutants defective for HUSH antagonism interact with TASOR.**

830 (A) HA-Vpx WT or indicated proteins were co-expressed with TASOR-Flag in HeLa cells, then an anti-  
831 HA immunoprecipitation was performed. (B) TASOR-Flag was co-expressed with HA-Vpx WT or  
832 indicated proteins in HeLa cells, then an anti-Flag immunoprecipitation was performed.

833

834 **S5 Fig. TASOR and SAMHD1 degradation induced by Vpx WT or mutants tested in macrophages**  
835 **from additional donors.**

836 (A) Short Kinetics of TASOR and SAMHD1 degradation by HIV-2.Gh1 Vpx WT or mutants brought  
837 by VLP in Monocyte-derived-Macrophages (MDM). Purified monocytes from healthy donors were  
838 differentiated 7 days with GM-CSF and M-CSF. After differentiation, MDM were transduced with  
839 indicated Vpx-containing VLPs and harvested at indicated times. Whole-cell extracts were analyzed by  
840 western-blot. *QV*: Vpx double mutant Q47A-V48A. *RQV*: Vpx triple mutant R42A-Q47A-V48A. *RR*:  
841 Vpx double mutant R34A-R42A. (B) Short kinetic of TASOR degradation by SIVagm.ver9063 Vpr in  
842 MDM. SIVagm.ver Vpr is unable to induce human SAMDH1 degradation.

# Figures

## Fig 1

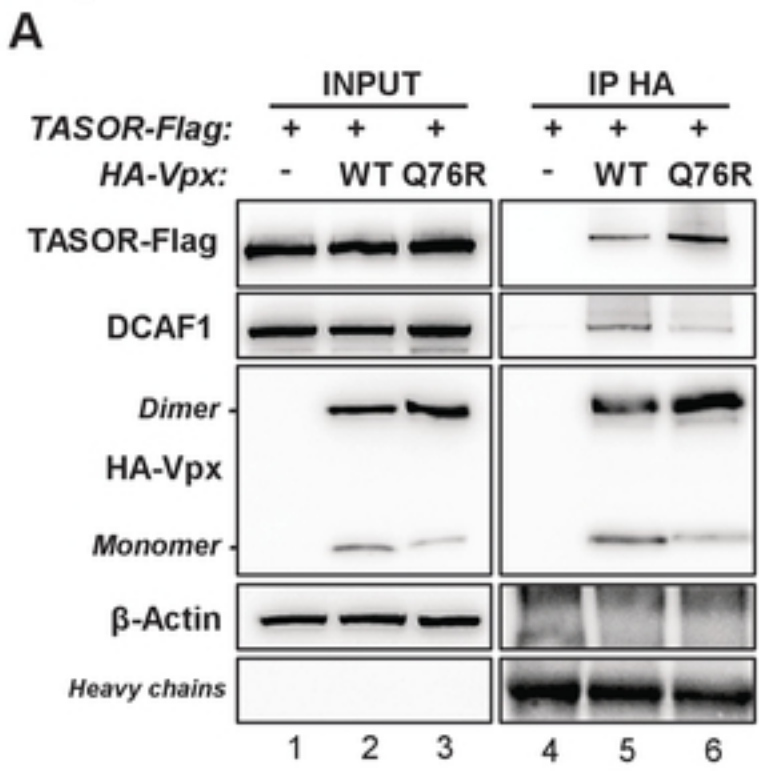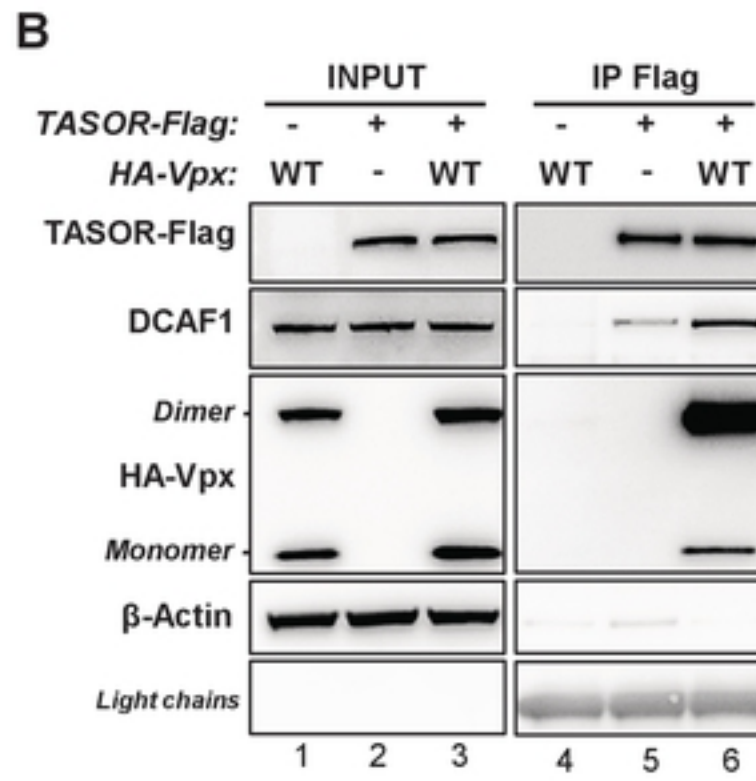

**C** bioRxiv preprint doi: <https://doi.org/10.1101/2021.05.06.442913>; this version posted May 6, 2021. The copyright holder for this preprint (which was not certified by peer review) is the author/funder, who has granted bioRxiv a license to display the preprint in perpetuity. It is made available under aCC-BY 4.0 International license.

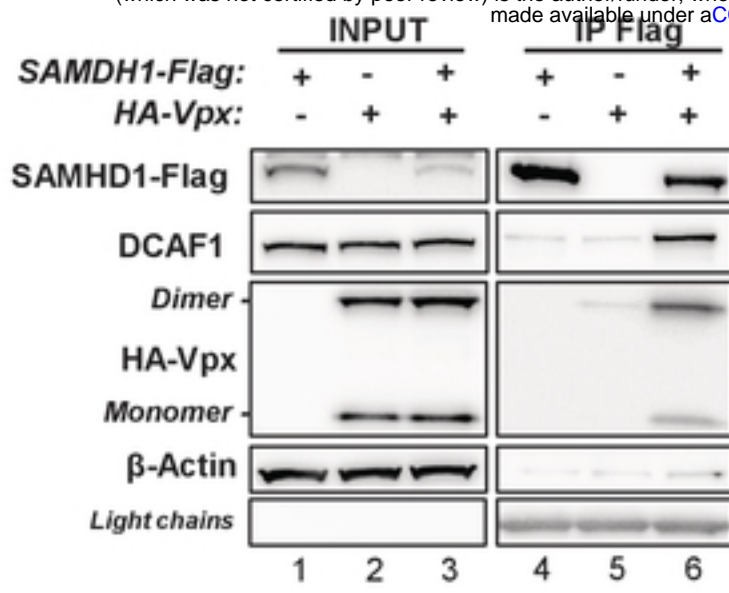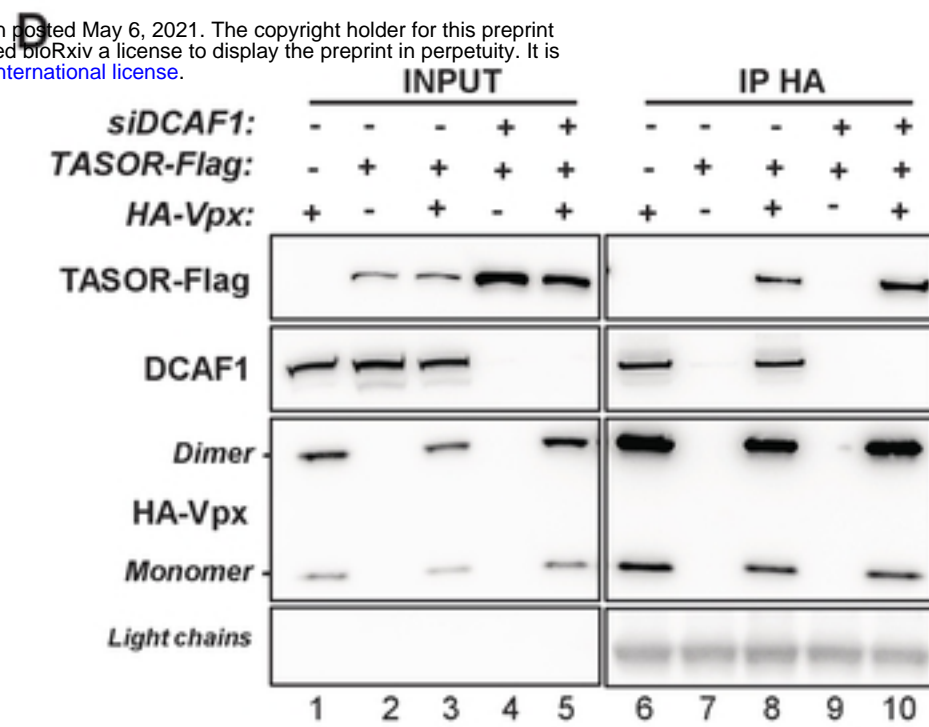

**Fig 2**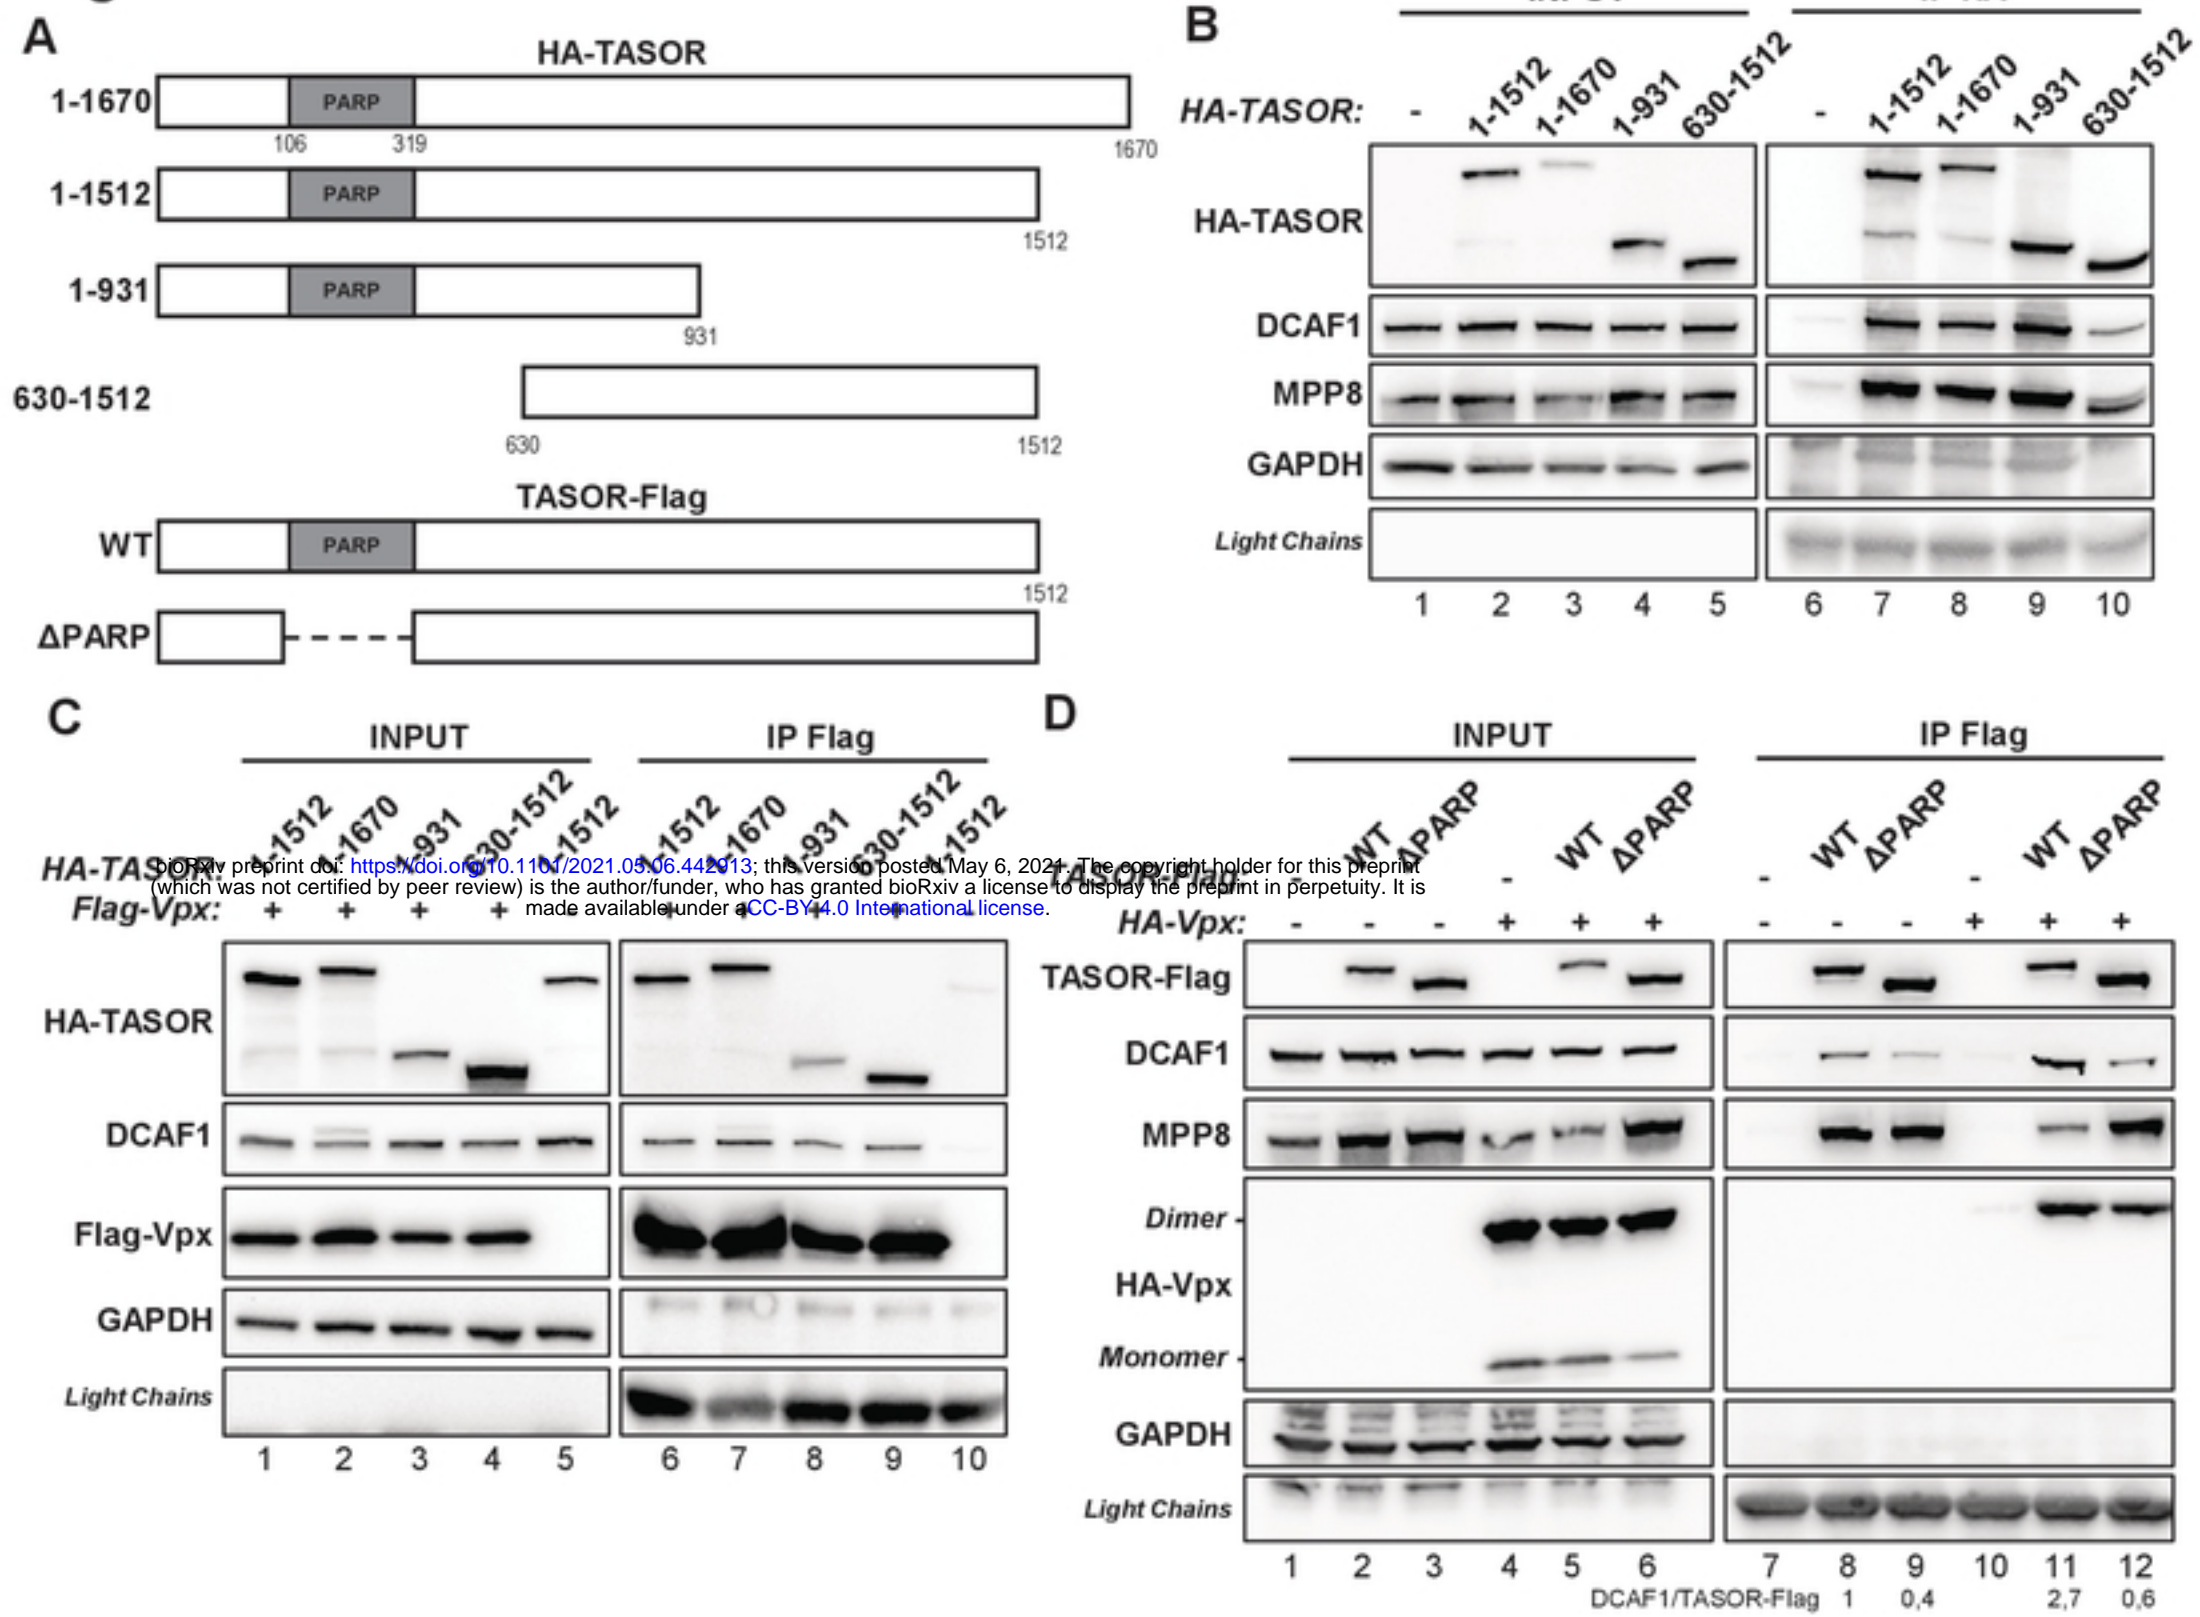

**Fig 3****A** *J-Lat A1 cells*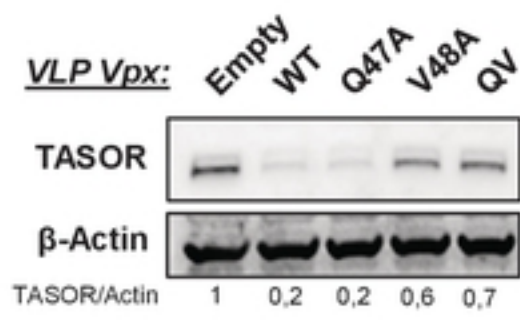**B**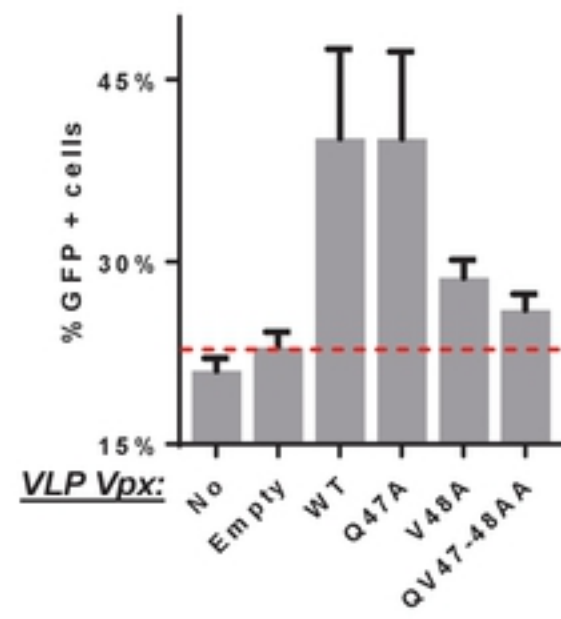**C** *THP-1 cells*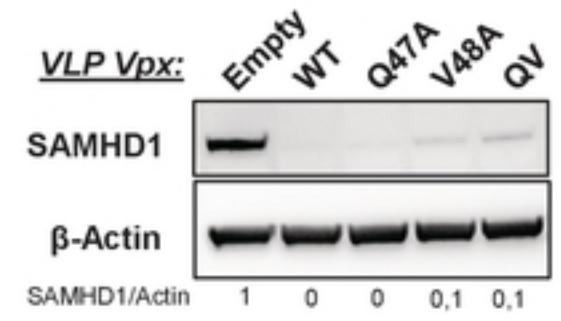**D**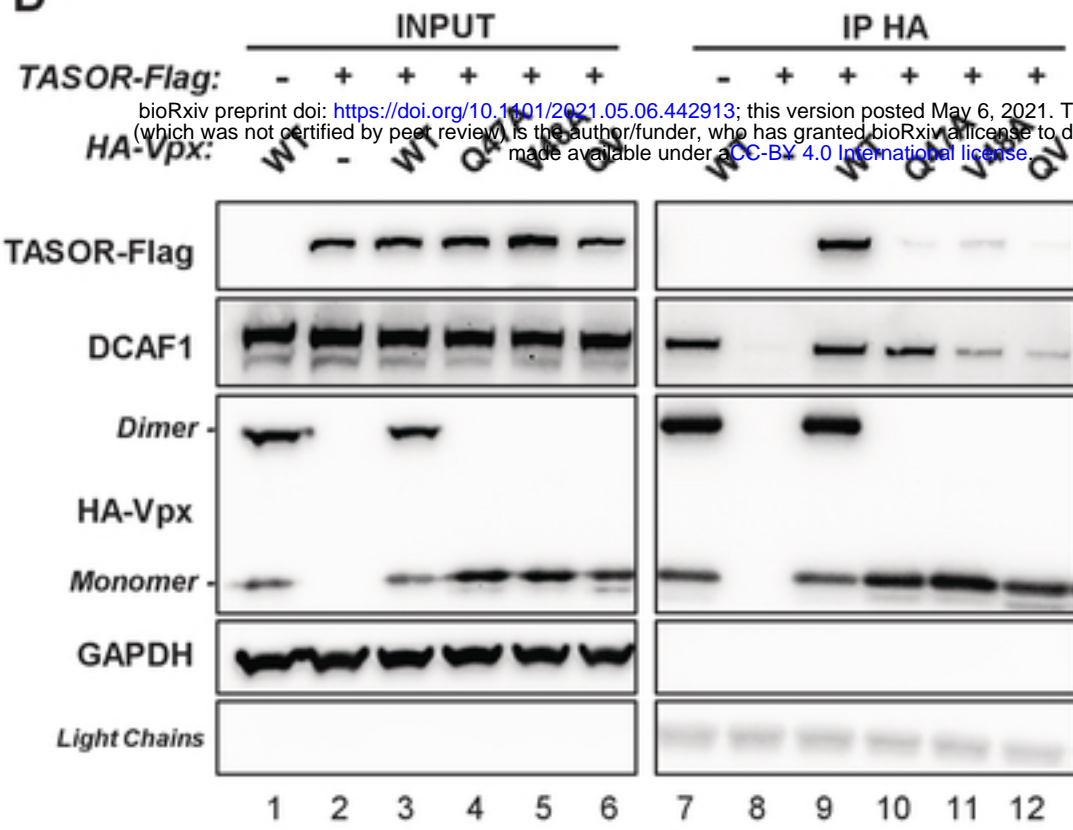**E**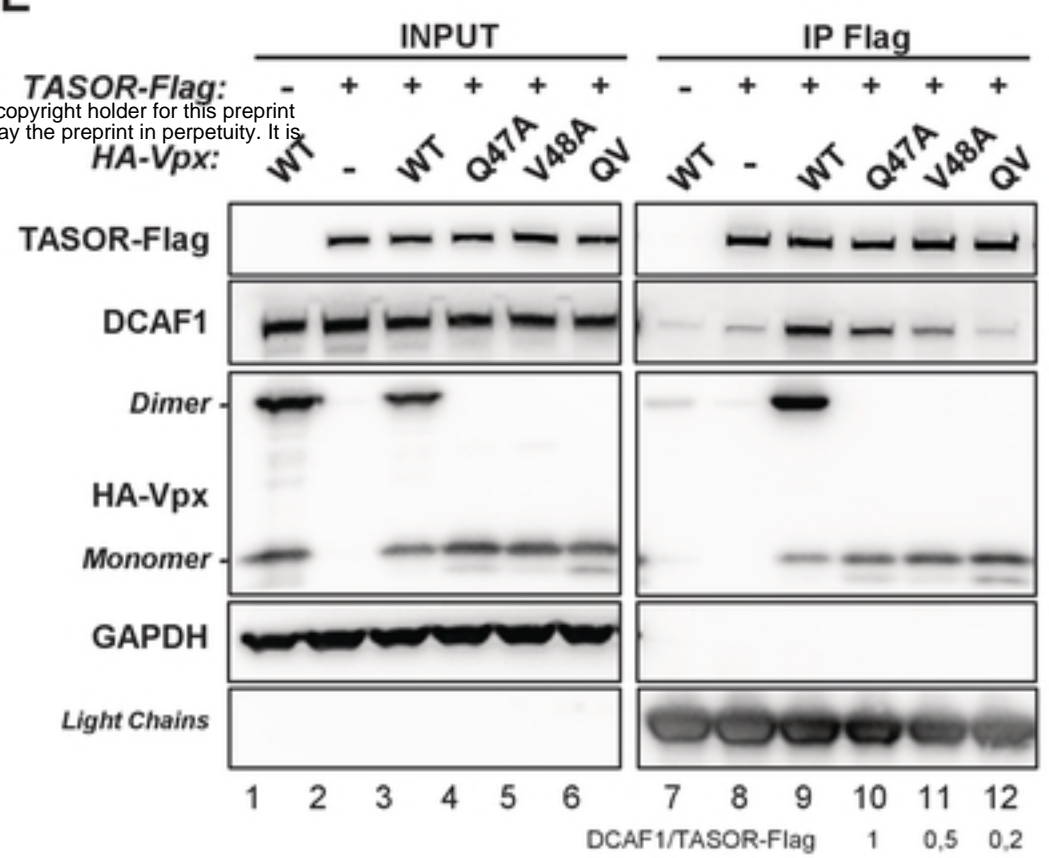

bioRxiv preprint doi: <https://doi.org/10.1101/2021.05.06.442913>; this version posted May 6, 2021. The copyright holder for this preprint (which was not certified by peer review) is the author/funder, who has granted bioRxiv a license to display the preprint in perpetuity. It is made available under aCC-BY 4.0 International license.

**Fig 4**

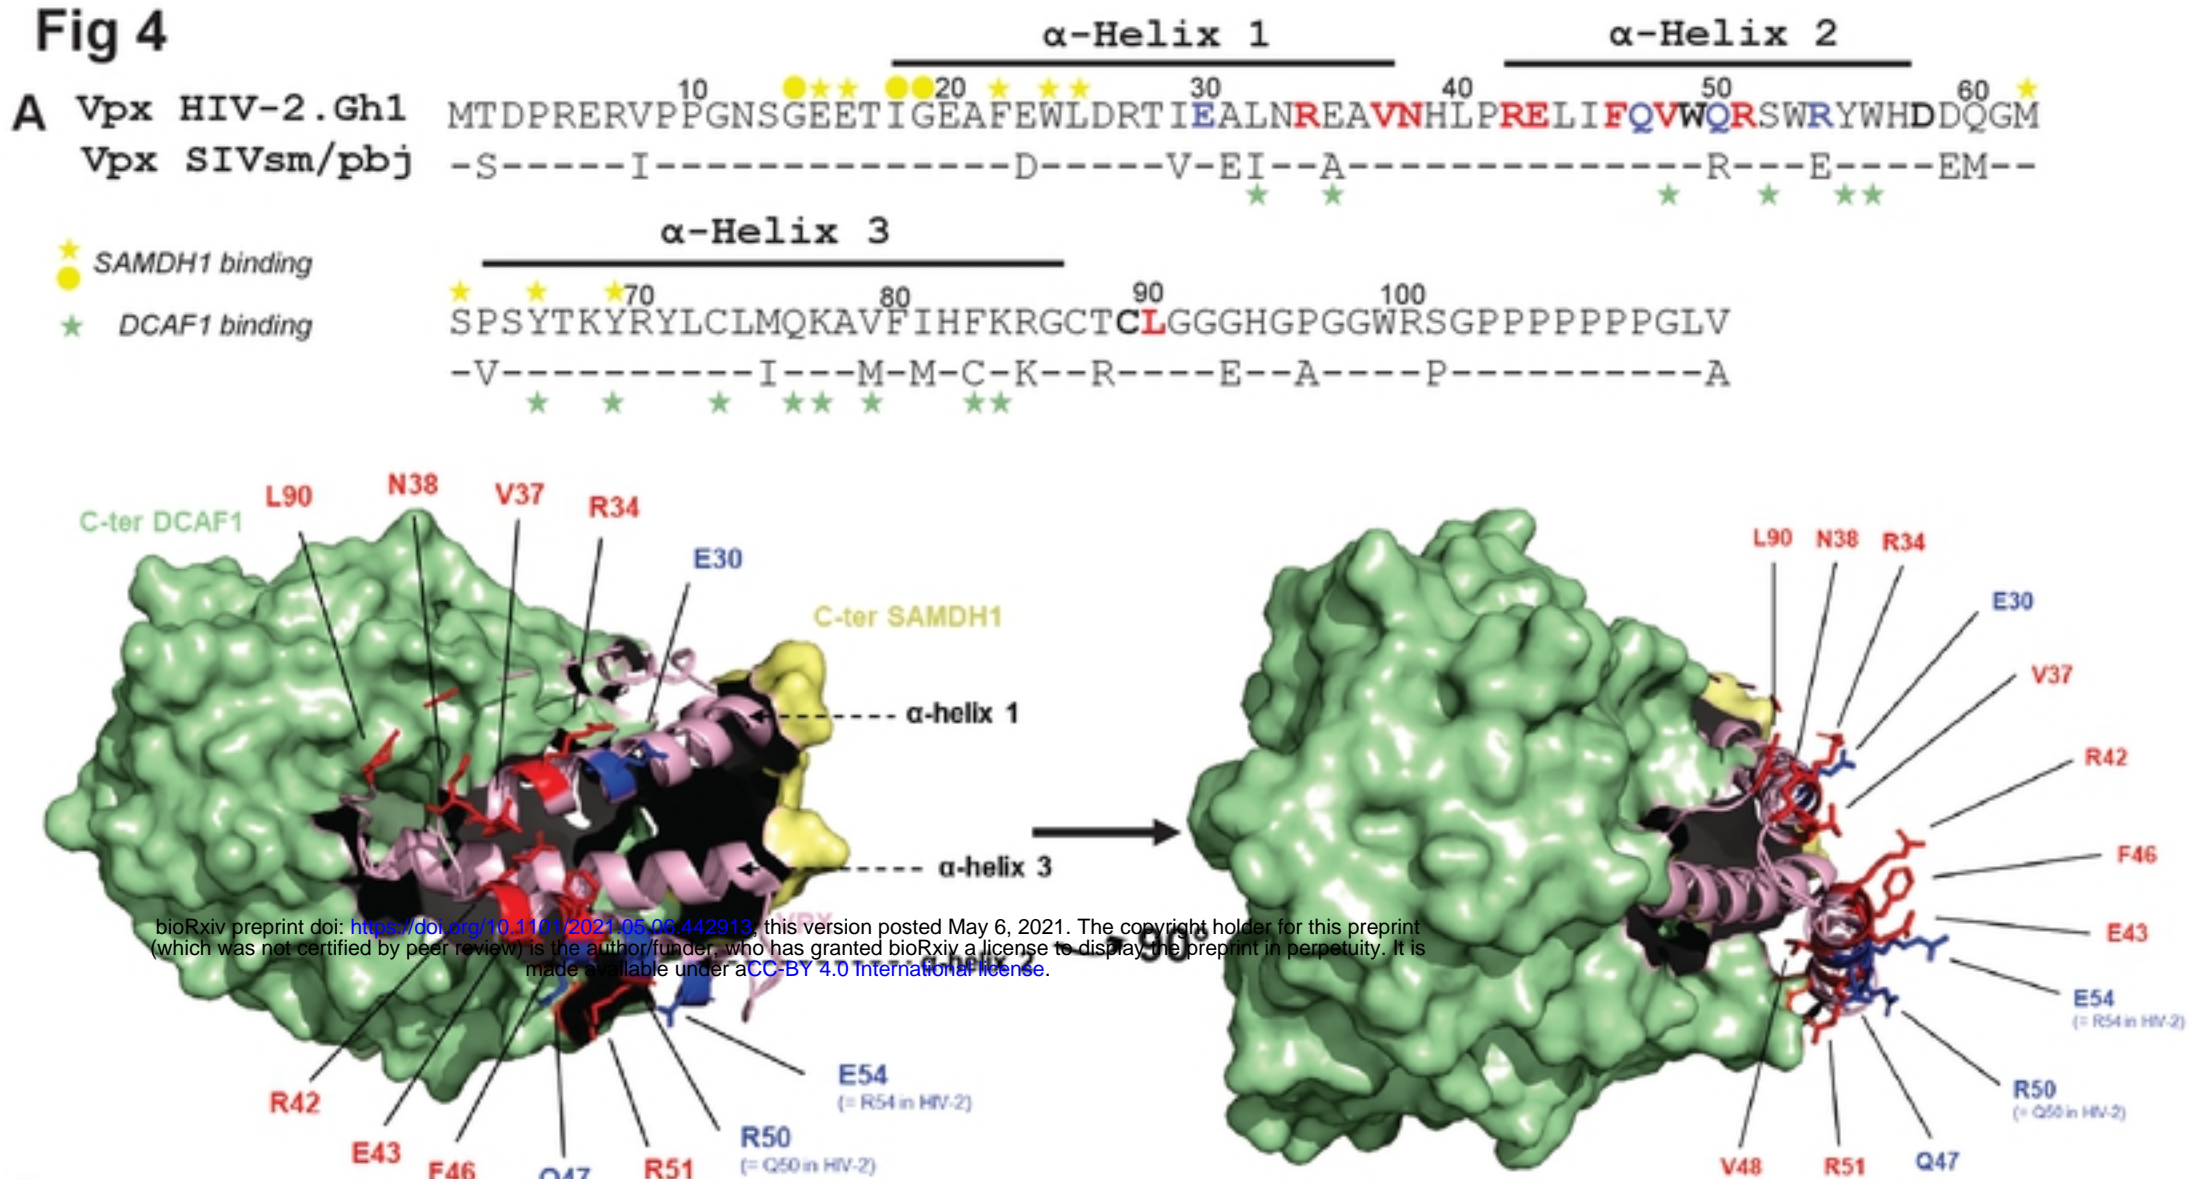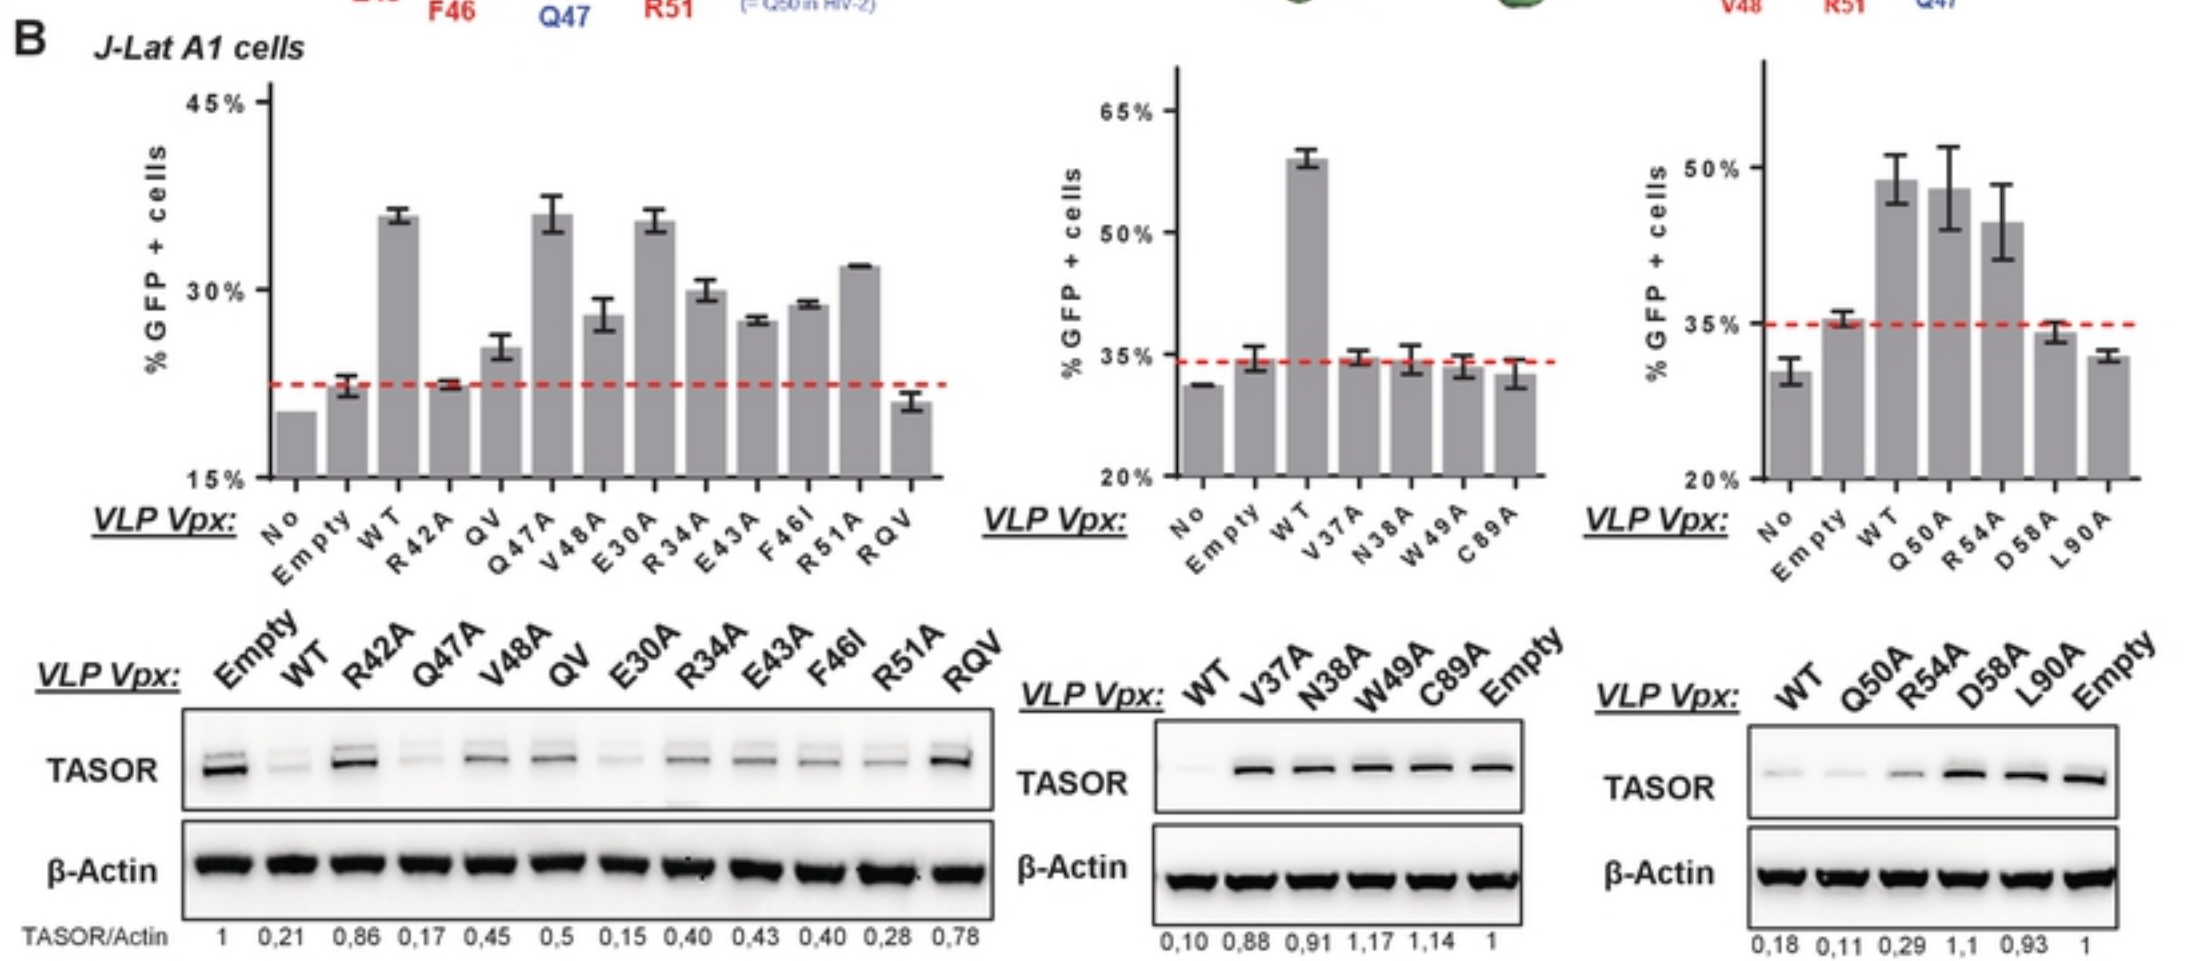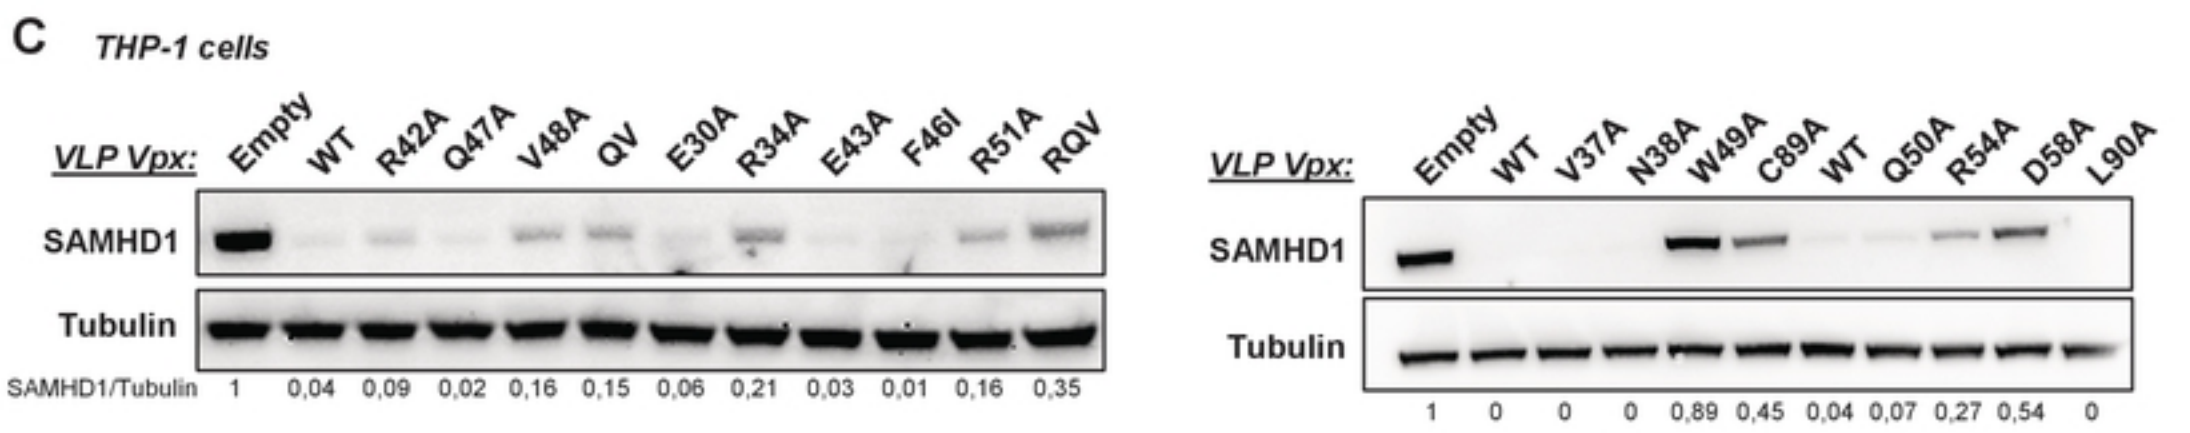

**Fig 5**

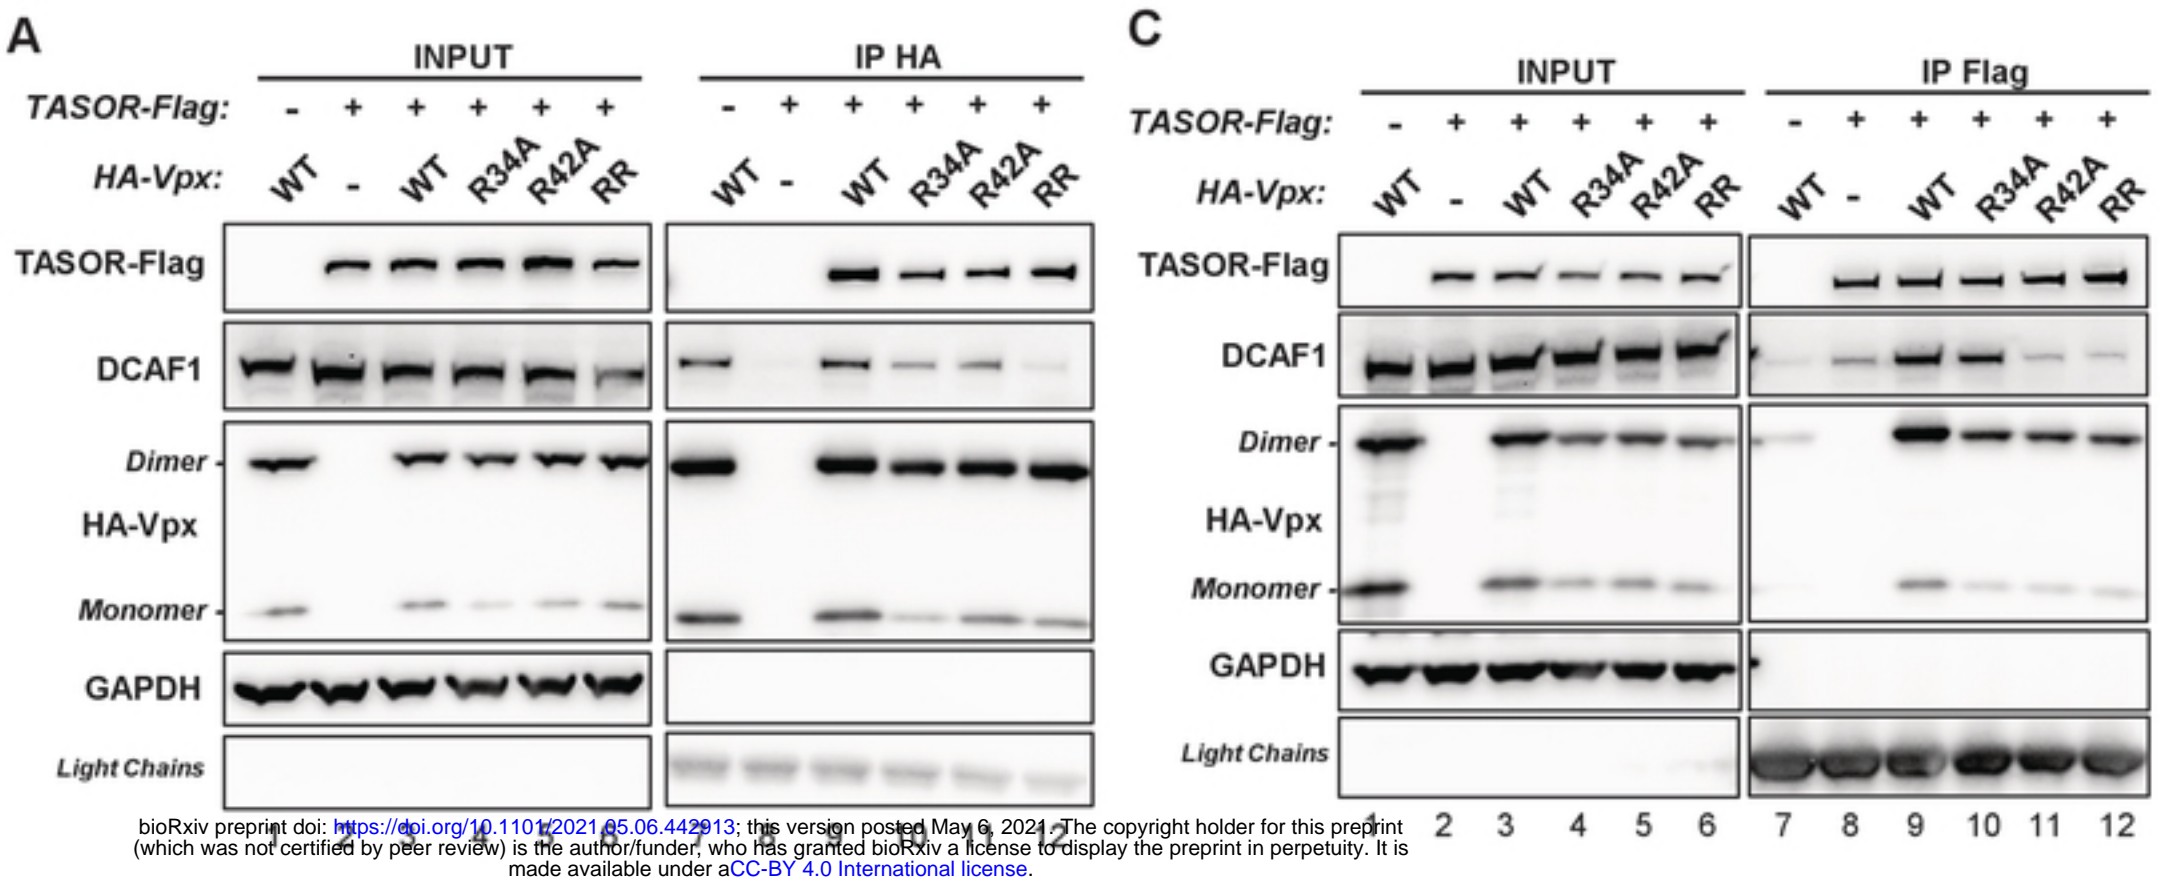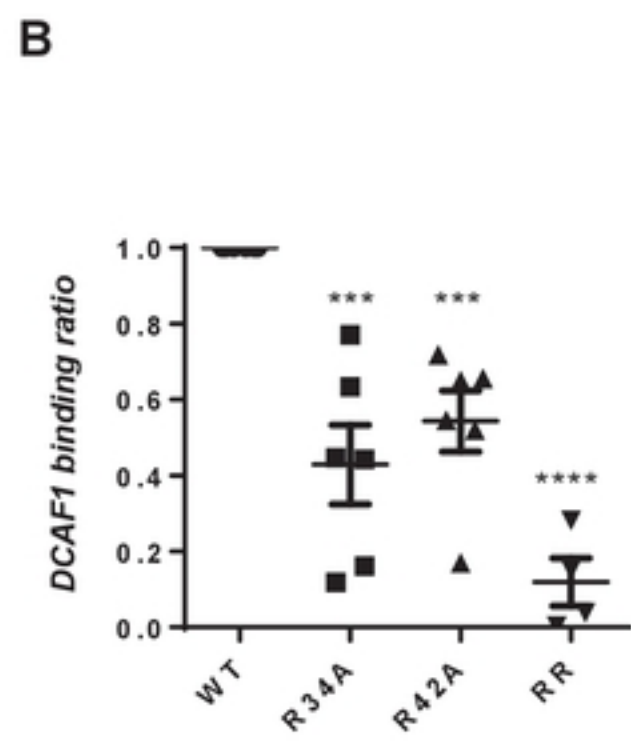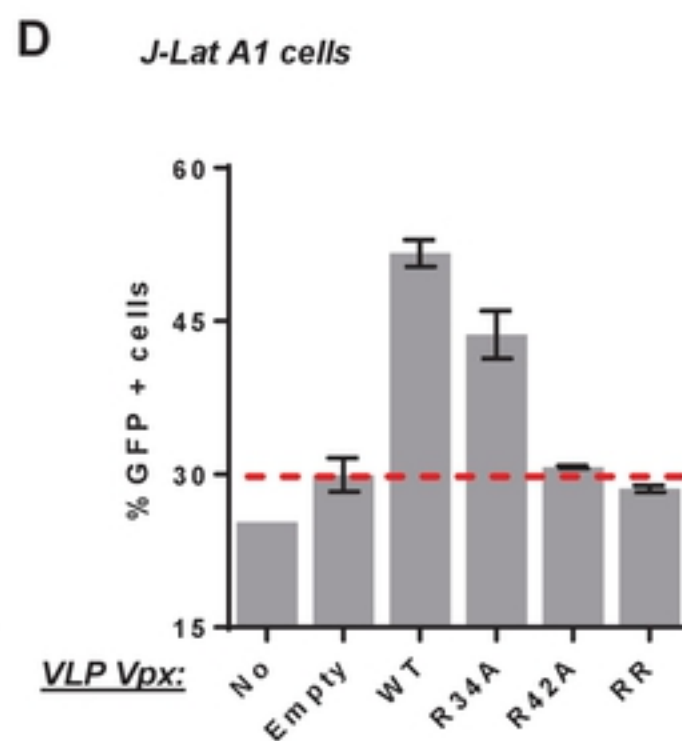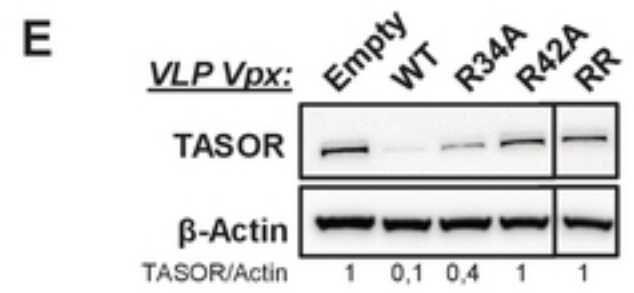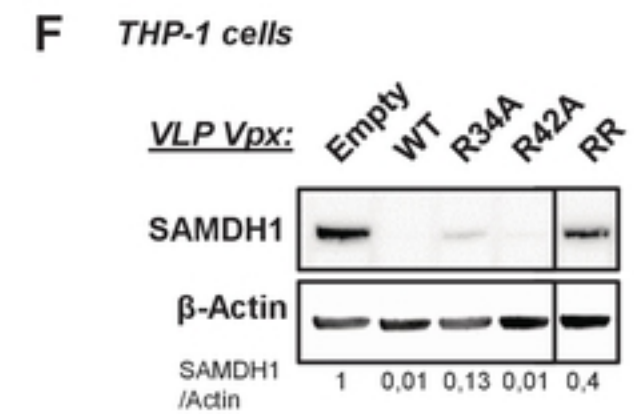

Fig 6

A

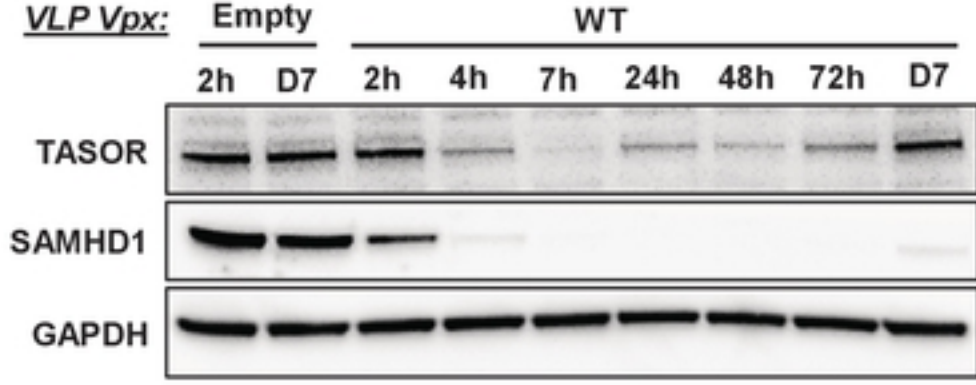

B Donor 1

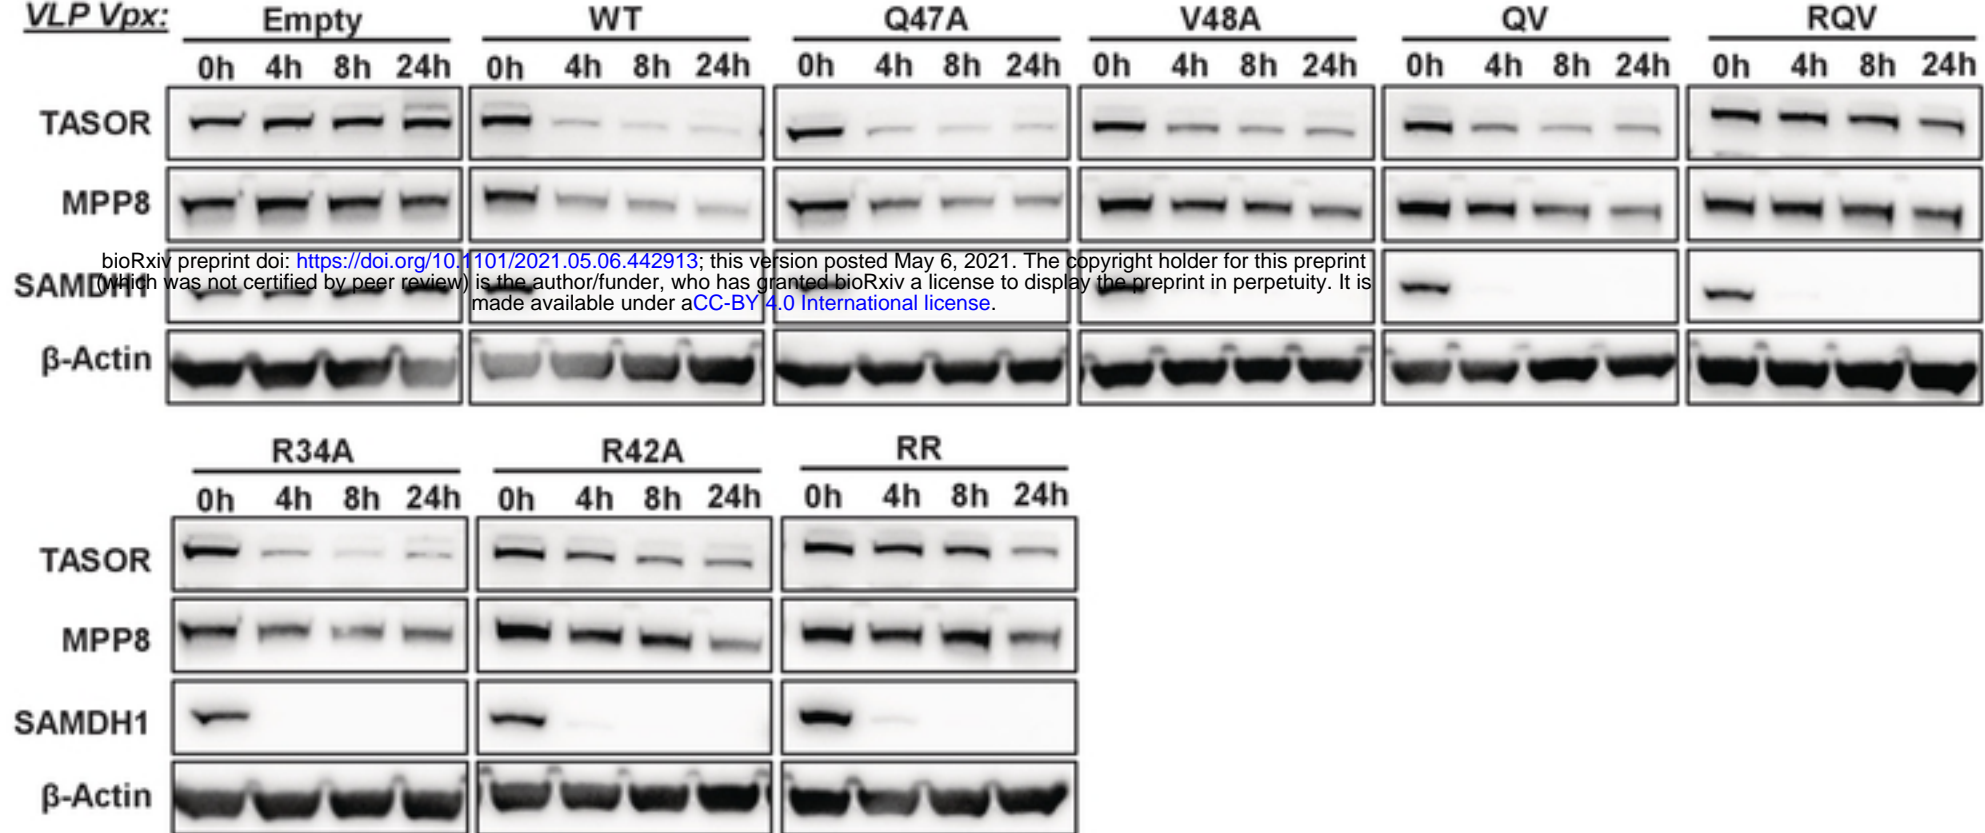



Fig 7

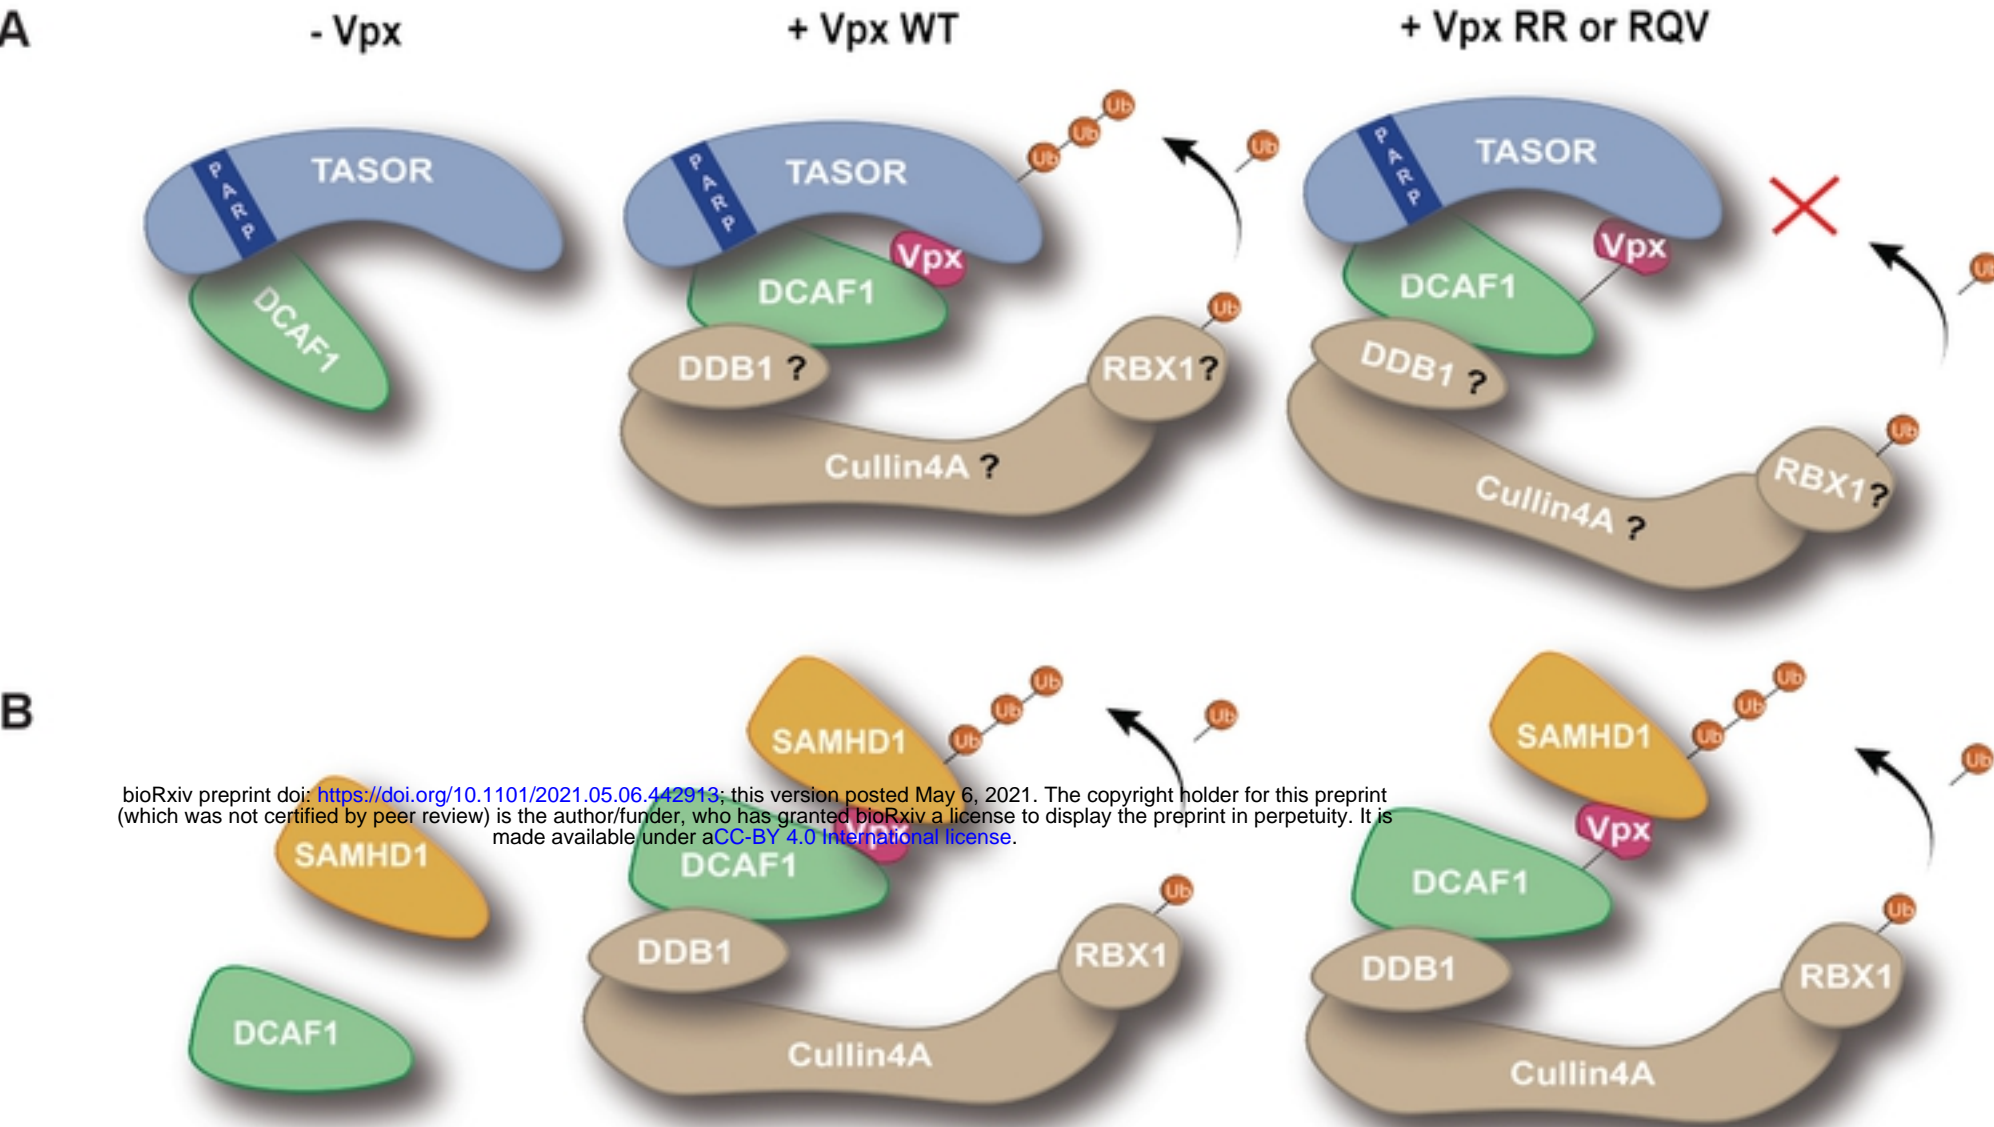

Source: https://www.biorxiv.org/content/10.1101/2021.05.06.442913v1.full.pdf
